# Supplementary material for: Computational insight into the reductive oligomerisation of CO at uranium(iii) mixed-sandwich complexes
Source: Royal Society of Chemistry journal article supplement (doi:10.1039/c2cc30864a), 2012-01-01
Supplement: c2cc30864a.pdf [file c2cc30864a.pdf]

## Electronic Supplementary Information

### Computational Insight into the Reductive Oligomerisation of CO at Uranium (III) Mixed-Sandwich Complexes

David McKay<sup>a</sup>, Alistair Frey<sup>b</sup>, Jennifer C. Green<sup>c</sup>, F. Geoffrey N. Cloke<sup>b</sup>, Laurent Maron<sup>a</sup>

Supplementary Information

#### Computational Details:

DFT Calculations were run with the Gaussian 03, Revision E.01,<sup>1</sup> via the B3PW91 method.<sup>2</sup> 6-31G\*\* basis sets were used for C, H and O and the Stuttgart-Dresden relativistic Effective Core Potential (ECP) and associated basis sets,<sup>3</sup> for Si and U (small core). Basis sets augmented with d-polarisation function<sup>4</sup> in the case of Si. Large core description of U adopted the ECP80MWB quasi-relativistic pseudopotential<sup>5</sup> with associated ECP80MWB-AVTZ basis sets, augmented with a single f-polarisation function from ECP80MWB2f. Geometry optimisations were performed without constraints. Minima and transition states were subjected to analytical frequency calculations and transition states further characterised through IRC calculations.<sup>6</sup>

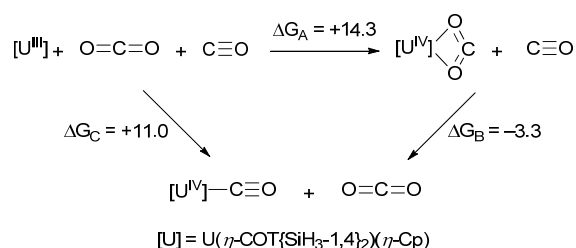

**ESI Scheme 1** Indirect calculation of  $\Delta G_{\text{C}}$ , the free energies of binding CO to and oxidation of U to give **2**. Energies in kcal.mol<sup>-1</sup>.

#### Computed Geometries:

##### 1 / small core

SCF (B3PW91) Energy = -990.305969  
 Enthalpy 0K = -990.058645  
 Enthalpy 298K = -990.040544  
 Free Energy 298K = -990.109759

|    |           |           |           |
|----|-----------|-----------|-----------|
| U  | -0.251894 | -0.050537 | -1.159708 |
| C  | -2.457109 | 1.367284  | -0.729280 |
| C  | -2.248340 | 1.400916  | -2.139950 |
| C  | -1.989423 | 0.446094  | -3.149002 |
| C  | -1.776926 | -0.951590 | -3.179400 |
| C  | -1.733977 | -1.982053 | -2.213385 |
| C  | -1.931665 | -2.070895 | -0.803485 |
| C  | -2.262204 | -1.098746 | 0.187065  |
| C  | -2.476703 | 0.299965  | 0.217276  |
| C  | 1.732958  | 1.325103  | 0.106362  |
| C  | 2.259394  | 0.972385  | -1.163710 |
| C  | 1.577834  | 0.135486  | 0.862072  |
| C  | 2.011780  | -0.952994 | 0.063896  |
| C  | 2.432463  | -0.437788 | -1.189530 |
| H  | -2.259957 | -1.508093 | 1.196221  |
| H  | -2.591299 | 0.648325  | 1.242714  |
| Si | -2.790758 | 3.063434  | 0.029120  |
| H  | -2.333943 | 3.098216  | 1.454096  |
| H  | -2.221758 | 2.413471  | -2.541145 |
| H  | -1.826506 | 0.909378  | -4.120267 |
| H  | -1.490214 | -1.303931 | -4.168374 |

|    |           |           |           |
|----|-----------|-----------|-----------|
| H  | -1.409635 | -2.922730 | -2.656690 |
| H  | -3.027689 | -4.570765 | -0.143887 |
| Si | -1.732089 | -3.818576 | -0.118048 |
| H  | -1.261915 | -3.772629 | 1.302114  |
| H  | -0.745836 | -4.590356 | -0.938793 |
| H  | 2.858299  | -1.013202 | -2.004065 |
| H  | 2.046929  | -1.992217 | 0.369893  |
| H  | 1.215147  | 0.072237  | 1.881280  |
| H  | 2.530763  | 1.662632  | -1.954871 |
| H  | 1.519108  | 2.330370  | 0.450873  |
| H  | -4.251822 | 3.395145  | 0.012518  |
| H  | -2.077728 | 4.129802  | -0.743208 |

##### 2

SCF (B3PW91) Energy = -664.011759  
 Enthalpy 0K = -663.757014  
 Enthalpy 298K = -663.736141  
 Free Energy 298K = -663.809808

|   |           |           |           |
|---|-----------|-----------|-----------|
| U | -0.275910 | -0.251774 | -0.349300 |
| C | -2.488214 | 1.285338  | -0.481036 |
| C | -1.901470 | 1.452073  | -1.776374 |
| C | -1.449383 | 0.582888  | -2.788762 |
| C | -1.262849 | -0.810899 | -2.924829 |
| C | -1.469873 | -1.938109 | -2.096573 |
| C | -2.134459 | -2.168234 | -0.850538 |
| C | -2.758034 | -1.281942 | 0.070735  |

|    |           |           |           |
|----|-----------|-----------|-----------|
| C  | -2.896817 | 0.120304  | 0.230188  |
| C  | 1.853752  | 1.474788  | -0.630220 |
| C  | 1.957758  | 0.593658  | -1.738537 |
| C  | 2.122522  | 0.728322  | 0.546467  |
| C  | 2.397163  | -0.618005 | 0.159989  |
| C  | 2.295972  | -0.696686 | -1.252636 |
| C  | -0.018357 | -0.892567 | 2.006068  |
| O  | 0.096543  | -1.187651 | 3.129108  |
| H  | -3.115631 | -1.796720 | 0.960738  |
| H  | -3.315501 | 0.351293  | 1.207918  |
| Si | -2.957708 | 2.909307  | 0.364081  |
| H  | -2.981426 | 2.735388  | 1.848470  |
| H  | -1.716403 | 2.494197  | -2.030694 |
| H  | -1.020870 | 1.129869  | -3.625696 |
| H  | -0.715950 | -1.064663 | -3.829869 |
| H  | -1.049186 | -2.842227 | -2.533568 |
| H  | -3.366674 | -4.674332 | -1.034879 |
| Si | -2.214359 | -3.991982 | -0.363455 |
| H  | -2.387729 | -4.129720 | 1.114295  |
| H  | -0.963137 | -4.692887 | -0.791833 |
| H  | 2.471708  | -1.578104 | -1.857037 |
| H  | 2.688001  | -1.421405 | 0.824234  |
| H  | 2.170174  | 1.120645  | 1.554004  |
| H  | 1.820106  | 0.863650  | -2.777969 |
| H  | 1.633232  | 2.534205  | -0.678310 |
| H  | -4.315101 | 3.367226  | -0.072774 |
| H  | -1.978433 | 3.980988  | 0.000172  |

### 3

SCF (B3PW91) Energy = -1328.051587  
Enthalpy 0K = -1327.539478  
Enthalpy 298K = -1327.496862  
Free Energy 298K = -1327.616356

|    |           |           |          |
|----|-----------|-----------|----------|
| U  | 0.059813  | 0.078533  | 2.375749 |
| C  | 2.217806  | 0.334027  | 4.149986 |
| H  | 2.819538  | 1.217931  | 4.355702 |
| C  | 2.720601  | -0.450179 | 3.076596 |
| C  | 2.233756  | -1.619754 | 2.434930 |
| C  | 1.089777  | -2.455263 | 2.538696 |
| H  | 1.107955  | -3.230484 | 1.774264 |
| C  | -0.098461 | -2.487686 | 3.317866 |
| C  | -0.574721 | -1.648088 | 4.363760 |
| C  | -0.062518 | -0.536272 | 5.072757 |
| C  | 1.087107  | 0.275373  | 4.988361 |
| H  | 1.043169  | 1.118366  | 5.673975 |
| H  | -0.778648 | -0.155084 | 5.797072 |
| H  | -1.581142 | -1.900404 | 4.693106 |
| Si | -1.272262 | -3.902092 | 2.887395 |
| H  | 2.863263  | -1.936770 | 1.604759 |
| Si | 4.383292  | 0.156441  | 2.419729 |
| C  | -1.463978 | 2.074825  | 1.244266 |
| C  | -2.435796 | 1.237934  | 1.866241 |
| C  | -2.271422 | 1.354757  | 3.263322 |
| C  | -1.220004 | 2.280218  | 3.507320 |
| C  | -0.723372 | 2.730181  | 2.261207 |
| H  | 0.068218  | 3.453215  | 2.110013 |
| H  | -0.870625 | 2.597293  | 4.481190 |
| H  | -2.857369 | 0.847201  | 4.018467 |
| H  | -3.187444 | 0.647391  | 1.359481 |
| H  | -1.357454 | 2.236156  | 0.181109 |

|    |           |           |           |
|----|-----------|-----------|-----------|
| C  | -1.012052 | -0.840151 | 0.340246  |
| O  | -1.577050 | -1.305853 | -0.603454 |
| U  | -0.021991 | -0.076012 | -2.354620 |
| C  | 0.135945  | 2.490235  | -3.296763 |
| H  | 1.618566  | 1.903140  | -4.672142 |
| C  | -1.052243 | 2.457697  | -2.517514 |
| C  | -2.196129 | 1.622075  | -2.413679 |
| C  | -2.682908 | 0.452461  | -3.055327 |
| H  | -2.825603 | 1.939022  | -1.583455 |
| C  | -2.180116 | -0.331679 | -4.128767 |
| C  | -1.049496 | -0.272882 | -4.967243 |
| C  | 0.100032  | 0.538886  | -5.051723 |
| C  | 0.612197  | 1.650715  | -4.342720 |
| H  | -1.005532 | -1.115854 | -5.652881 |
| H  | 0.816132  | 0.157799  | -5.776119 |
| H  | -2.781765 | -1.215648 | -4.334442 |
| Si | -4.345491 | -0.154337 | -2.398358 |
| H  | -1.070467 | 3.232942  | -1.753108 |
| C  | 2.473834  | -1.235284 | -1.845608 |
| C  | 1.502202  | -2.072227 | -1.223411 |
| C  | 0.761417  | -2.727635 | -2.240189 |
| C  | 1.257720  | -2.277622 | -3.486414 |
| C  | 2.309150  | -1.352109 | -3.242651 |
| H  | 2.894906  | -0.844527 | -3.997927 |
| H  | 0.908130  | -2.594708 | -4.460205 |
| H  | -0.030083 | -3.450730 | -2.088821 |
| H  | 1.396040  | -2.233656 | -0.160232 |
| H  | 3.225574  | -0.644716 | -1.339011 |
| C  | 1.050219  | 0.842689  | -0.319298 |
| O  | 1.615171  | 1.308237  | 0.624485  |
| H  | 4.569502  | -0.254552 | 0.992569  |
| H  | 4.486572  | 1.644395  | 2.527652  |
| H  | 5.512657  | -0.435841 | 3.206653  |
| H  | -2.694461 | -3.482150 | 3.087397  |
| H  | -1.073259 | -4.329586 | 1.467553  |
| H  | -1.022858 | -5.091553 | 3.763236  |
| H  | -4.448645 | -1.642297 | -2.506317 |
| H  | -4.531655 | 0.256593  | -0.971173 |
| H  | -5.474969 | 0.437864  | -3.185181 |
| Si | 1.309630  | 3.904746  | -2.866334 |
| H  | 2.731847  | 3.485012  | -3.066643 |
| H  | 1.059913  | 5.094297  | -3.741965 |
| H  | 1.110840  | 4.332035  | -1.446398 |

### 3-4-TS

SCF (B3PW91) Energy = -1328.050851  
Enthalpy 0K = -1327.539328  
Enthalpy 298K = -1327.497318  
Free Energy 298K = -1327.616378  
Negative frequency = -69.5 cm<sup>-1</sup>

|   |           |           |          |
|---|-----------|-----------|----------|
| U | 0.058009  | 0.108579  | 2.494350 |
| C | 2.156102  | 0.287619  | 4.309291 |
| H | 2.751457  | 1.160552  | 4.572465 |
| C | 2.689438  | -0.449237 | 3.213711 |
| C | 2.225388  | -1.598045 | 2.522387 |
| C | 1.080831  | -2.437445 | 2.557580 |
| H | 1.120831  | -3.171266 | 1.754383 |
| C | -0.137536 | -2.495401 | 3.284252 |
| C | -0.651323 | -1.696860 | 4.346806 |
| C | -0.160653 | -0.611380 | 5.109442 |

|    |           |           |           |
|----|-----------|-----------|-----------|
| C  | 1.001688  | 0.192454  | 5.109030  |
| H  | 0.931361  | 1.007442  | 5.825219  |
| H  | -0.901585 | -0.251074 | 5.819228  |
| H  | -1.669958 | -1.955357 | 4.629566  |
| Si | -1.300300 | -3.889207 | 2.754190  |
| H  | 2.880117  | -1.882569 | 1.700403  |
| Si | 4.361562  | 0.198370  | 2.614533  |
| C  | -1.380179 | 2.124336  | 1.303332  |
| C  | -2.382373 | 1.298387  | 1.886519  |
| C  | -2.273822 | 1.417375  | 3.289300  |
| C  | -1.220671 | 2.331120  | 3.574894  |
| C  | -0.672160 | 2.773323  | 2.348197  |
| H  | 0.130279  | 3.490346  | 2.226060  |
| H  | -0.909487 | 2.649772  | 4.561480  |
| H  | -2.897527 | 0.920392  | 4.021244  |
| H  | -3.109795 | 0.704730  | 1.348352  |
| H  | -1.225819 | 2.276003  | 0.243759  |
| C  | -0.765189 | -0.713842 | 0.253570  |
| O  | -1.418855 | -1.267321 | -0.598717 |
| U  | -0.011655 | -0.092283 | -2.402152 |
| C  | 0.118100  | 2.469855  | -3.372264 |
| H  | 1.532744  | 1.898303  | -4.819472 |
| C  | -1.032810 | 2.435429  | -2.536194 |
| C  | -2.175637 | 1.603501  | -2.393716 |
| C  | -2.685002 | 0.436087  | -3.022743 |
| H  | -2.772790 | 1.916771  | -1.538498 |
| C  | -2.222106 | -0.350556 | -4.113684 |
| C  | -1.131130 | -0.288978 | -5.003661 |
| C  | 0.005659  | 0.530888  | -5.139811 |
| C  | 0.542375  | 1.640933  | -4.447279 |
| H  | -1.117164 | -1.129596 | -5.693662 |
| H  | 0.688093  | 0.161583  | -5.901909 |
| H  | -2.830778 | -1.235819 | -4.291879 |
| Si | -4.318909 | -0.175965 | -2.306865 |
| H  | -1.016581 | 3.207608  | -1.768662 |
| C  | 2.563462  | -1.171279 | -2.113053 |
| C  | 1.698695  | -1.965524 | -1.304994 |
| C  | 0.857344  | -2.721596 | -2.164132 |
| C  | 1.178789  | -2.370813 | -3.493895 |
| C  | 2.228176  | -1.409152 | -3.462198 |
| H  | 2.700469  | -0.957950 | -4.324607 |
| H  | 0.717597  | -2.774226 | -4.386186 |
| H  | 0.108620  | -3.439555 | -1.854798 |
| H  | 1.736909  | -2.043971 | -0.227322 |
| H  | 3.350875  | -0.520957 | -1.755301 |
| C  | 1.113529  | 0.808379  | -0.416501 |
| O  | 1.622332  | 1.185010  | 0.595391  |
| H  | 4.601977  | -0.214803 | 1.198229  |
| H  | 4.418105  | 1.688646  | 2.724362  |
| H  | 5.470081  | -0.361131 | 3.452491  |
| H  | -2.725092 | -3.458817 | 2.900623  |
| H  | -1.030637 | -4.278586 | 1.336972  |
| H  | -1.097870 | -5.097568 | 3.615361  |
| H  | -4.420747 | -1.665609 | -2.397912 |
| H  | -4.465523 | 0.243474  | -0.876769 |
| H  | -5.481242 | 0.401168  | -3.057452 |
| Si | 1.320672  | 3.867097  | -2.974762 |
| H  | 2.731503  | 3.440337  | -3.235931 |
| H  | 1.051971  | 5.074497  | -3.820957 |
| H  | 1.188272  | 4.280373  | -1.542029 |

#### 4

|                       |              |           |           |
|-----------------------|--------------|-----------|-----------|
| SCF (B3PW91) Energy = | -1328.069475 |           |           |
| Enthalpy 0K =         | -1327.556450 |           |           |
| Enthalpy 298K =       | -1327.514034 |           |           |
| Free Energy 298K =    | -1327.637663 |           |           |
| U                     | -0.168548    | 0.346168  | 0.114506  |
| C                     | -0.041886    | 0.197801  | 2.849076  |
| Si                    | 1.419117     | 0.311201  | 4.042496  |
| C                     | -0.365912    | -1.116357 | 2.426833  |
| C                     | -1.273825    | -1.720673 | 1.518563  |
| C                     | -2.274528    | -1.282303 | 0.610407  |
| Si                    | -3.060619    | -2.654005 | -0.424201 |
| C                     | -2.837632    | 0.007972  | 0.366629  |
| C                     | -2.645895    | 1.295343  | 0.908678  |
| C                     | -1.763406    | 1.895014  | 1.839616  |
| C                     | -0.653028    | 1.464172  | 2.584764  |
| H                     | -0.136923    | 2.298817  | 3.057179  |
| H                     | -1.884393    | 2.975363  | 1.872301  |
| H                     | -3.270745    | 2.035130  | 0.413459  |
| H                     | -3.568733    | 0.016404  | -0.439909 |
| H                     | -1.059623    | -2.782904 | 1.417617  |
| H                     | 0.333264     | -1.857001 | 2.810594  |
| C                     | 1.566312     | 1.832843  | -1.473149 |
| C                     | 0.809105     | 1.050646  | -2.385178 |
| C                     | -0.525559    | 1.531918  | -2.372694 |
| C                     | -0.592858    | 2.602482  | -1.448141 |
| C                     | 0.702666     | 2.788000  | -0.889254 |
| H                     | 0.982241     | 3.545502  | -0.167306 |
| H                     | -1.469703    | 3.195645  | -1.224796 |
| H                     | -1.342142    | 1.160415  | -2.979712 |
| H                     | 1.188840     | 0.262889  | -3.021628 |
| H                     | 2.620403     | 1.715873  | -1.256836 |
| C                     | 0.962234     | -1.697162 | -1.005330 |
| O                     | 1.011188     | -2.707999 | -1.745268 |
| U                     | 3.444360     | -3.533265 | -1.351906 |
| C                     | 6.122946     | -3.255342 | -1.576577 |
| H                     | 6.509418     | -5.291204 | -1.661514 |
| C                     | 5.590819     | -1.947995 | -1.796603 |
| C                     | 4.609085     | -1.467783 | -2.704539 |
| C                     | 3.695529     | -2.032806 | -3.631717 |
| H                     | 4.416835     | -0.403630 | -2.583517 |
| C                     | 3.344699     | -3.330226 | -4.083923 |
| C                     | 3.919084     | -4.616367 | -3.835210 |
| C                     | 2.307112     | -1.489045 | -0.248084 |
| C                     | 5.014486     | -5.089021 | -3.091498 |
| C                     | 5.904110     | -4.527683 | -2.144703 |
| H                     | 3.384851     | -5.428763 | -4.325809 |
| H                     | 5.109600     | -6.171132 | -3.143630 |
| Si                    | 1.895722     | -3.382280 | -5.295554 |
| H                     | 3.018355     | -1.267281 | -4.005747 |
| Si                    | 6.400233     | -0.613929 | -0.730949 |
| H                     | 6.847893     | -3.296912 | -0.765569 |
| C                     | 3.932969     | -5.650251 | 0.392788  |
| C                     | 3.594388     | -4.562434 | 1.229421  |
| C                     | 2.222366     | -4.262478 | 1.019273  |
| C                     | 1.711258     | -5.181123 | 0.064537  |
| C                     | 2.766903     | -6.032574 | -0.331460 |
| H                     | 2.697329     | -6.850889 | -1.037582 |
| H                     | 0.693490     | -5.214732 | -0.303517 |

|   |           |           |           |
|---|-----------|-----------|-----------|
| H | 1.652395  | -3.509428 | 1.546446  |
| H | 4.258083  | -4.052775 | 1.917115  |
| H | 4.901986  | -6.127801 | 0.329834  |
| O | 2.259066  | -0.474616 | 0.488064  |
| H | 5.509767  | 0.580549  | -0.624296 |
| H | 6.697674  | -1.147280 | 0.634827  |
| H | 7.699005  | -0.173754 | -1.334759 |
| H | 1.037148  | -4.580184 | -5.038979 |
| H | 1.075886  | -2.138160 | -5.183478 |
| H | 2.393999  | -3.485262 | -6.705368 |
| H | -3.355884 | -2.161888 | -1.805669 |
| H | -2.154502 | -3.839518 | -0.492518 |
| H | -4.357795 | -3.094195 | 0.183202  |
| H | 0.933957  | 0.457366  | 5.453053  |
| H | 2.255083  | -0.924297 | 3.962910  |
| H | 2.258143  | 1.511181  | 3.735358  |

#### 4-5-TS

SCF (B3PW91) Energy = -1328.059296

Enthalpy 0K = -1327.547788

Enthalpy 298K = -1327.505962

Free Energy 298K = -1327.626619

Negative frequency = -697.8 cm<sup>-1</sup>

|    |           |           |           |
|----|-----------|-----------|-----------|
| U  | 0.032682  | 0.353386  | 0.220539  |
| C  | -0.516005 | 0.232734  | 2.894289  |
| Si | 0.590133  | 0.434660  | 4.414065  |
| C  | -0.655262 | -1.104520 | 2.440978  |
| C  | -1.292306 | -1.766912 | 1.360385  |
| C  | -2.076864 | -1.403311 | 0.233330  |
| Si | -2.625170 | -2.846564 | -0.859585 |
| C  | -2.598535 | -0.145115 | -0.201308 |
| C  | -2.607542 | 1.161855  | 0.323470  |
| C  | -1.994776 | 1.814642  | 1.419969  |
| C  | -1.110047 | 1.454303  | 2.454764  |
| H  | -0.772465 | 2.325076  | 3.014076  |
| H  | -2.157608 | 2.889477  | 1.387607  |
| H  | -3.110852 | 1.863611  | -0.337175 |
| H  | -3.114993 | -0.199163 | -1.158393 |
| H  | -1.024153 | -2.821755 | 1.351328  |
| H  | -0.022679 | -1.798364 | 2.990771  |
| C  | 2.104982  | 1.761198  | -0.940685 |
| C  | 1.383021  | 1.224684  | -2.038634 |
| C  | 0.130897  | 1.886305  | -2.105938 |
| C  | 0.079506  | 2.827948  | -1.048759 |
| C  | 1.301169  | 2.751114  | -0.324917 |
| H  | 1.580030  | 3.364959  | 0.522958  |
| H  | -0.737905 | 3.506150  | -0.842035 |
| H  | -0.640753 | 1.718799  | -2.847227 |
| H  | 1.734144  | 0.462660  | -2.719769 |
| H  | 3.093616  | 1.457190  | -0.622115 |
| C  | 1.030972  | -1.880463 | -0.821511 |
| O  | 0.878316  | -2.948498 | -1.464083 |
| U  | 3.390935  | -3.485025 | -1.331538 |
| C  | 6.003837  | -3.321680 | -1.996470 |
| H  | 6.318213  | -5.371149 | -2.040750 |
| C  | 5.479817  | -2.007037 | -2.189032 |
| C  | 4.383732  | -1.532403 | -2.958122 |
| C  | 3.323077  | -2.109861 | -3.702869 |
| H  | 4.239220  | -0.458395 | -2.860590 |
| C  | 2.864302  | -3.412375 | -4.024292 |

|    |           |           |           |
|----|-----------|-----------|-----------|
| C  | 3.415646  | -4.707124 | -3.778511 |
| C  | 2.224282  | -1.586368 | -0.033815 |
| C  | 4.608587  | -5.187880 | -3.202106 |
| C  | 5.661982  | -4.611199 | -2.459057 |
| H  | 2.779404  | -5.520332 | -4.124623 |
| H  | 4.659234  | -6.273988 | -3.206559 |
| Si | 1.236681  | -3.458691 | -4.985314 |
| H  | 2.619256  | -1.339592 | -4.012189 |
| Si | 6.490558  | -0.654859 | -1.341614 |
| H  | 6.848475  | -3.353233 | -1.310746 |
| C  | 4.384079  | -5.238684 | 0.594961  |
| C  | 3.896059  | -4.137824 | 1.332713  |
| C  | 2.478999  | -4.125756 | 1.207072  |
| C  | 2.095306  | -5.234563 | 0.406861  |
| C  | 3.269597  | -5.917119 | 0.020164  |
| H  | 3.316960  | -6.812169 | -0.587330 |
| H  | 1.081736  | -5.503360 | 0.138395  |
| H  | 1.807288  | -3.440435 | 1.706248  |
| H  | 4.488405  | -3.432656 | 1.902398  |
| H  | 5.421259  | -5.532491 | 0.501516  |
| O  | 2.161898  | -0.693190 | 0.871607  |
| H  | 5.641803  | 0.548231  | -1.085382 |
| H  | 7.049857  | -1.159898 | -0.049087 |
| H  | 7.642514  | -0.233486 | -2.201086 |
| H  | 0.391522  | -4.608910 | -4.540237 |
| H  | 0.491673  | -2.175722 | -4.813118 |
| H  | 1.507412  | -3.644077 | -6.448360 |
| H  | -2.547041 | -2.482670 | -2.307017 |
| H  | -1.801095 | -4.058892 | -0.579868 |
| H  | -4.056103 | -3.178451 | -0.559917 |
| H  | -0.233738 | 0.486555  | 5.664209  |
| H  | 1.537426  | -0.714931 | 4.524708  |
| H  | 1.359278  | 1.715805  | 4.330805  |

#### 5

SCF (B3PW91) Energy = -1328.089960

Enthalpy 0K = -1327.576503

Enthalpy 298K = -1327.533948

Free Energy 298K = -1327.658478

|    |           |           |           |
|----|-----------|-----------|-----------|
| U  | -0.006578 | 0.526233  | 0.439385  |
| C  | -0.529943 | 0.640231  | 3.100350  |
| Si | 0.593904  | 0.915828  | 4.594924  |
| C  | -0.739819 | -0.720954 | 2.762685  |
| C  | -1.382870 | -1.448773 | 1.728929  |
| C  | -2.139089 | -1.146951 | 0.566524  |
| Si | -2.679341 | -2.654393 | -0.441178 |
| C  | -2.666296 | 0.088833  | 0.069917  |
| C  | -2.643302 | 1.427063  | 0.502262  |
| C  | -1.948905 | 2.155324  | 1.496034  |
| C  | -1.033901 | 1.850365  | 2.528676  |
| H  | -0.632551 | 2.750331  | 2.991062  |
| H  | -2.064096 | 3.228589  | 1.365602  |
| H  | -3.155215 | 2.086587  | -0.194401 |
| H  | -3.204340 | -0.020868 | -0.870165 |
| H  | -1.114457 | -2.501409 | 1.786809  |
| H  | -0.130071 | -1.391977 | 3.364183  |
| C  | 1.972887  | 1.691282  | -1.083289 |
| C  | 1.139589  | 1.031772  | -2.023573 |
| C  | -0.098762 | 1.720120  | -2.073197 |
| C  | -0.028373 | 2.805870  | -1.162366 |

|    |           |           |           |    |           |           |           |
|----|-----------|-----------|-----------|----|-----------|-----------|-----------|
| C  | 1.252958  | 2.788993  | -0.550292 | C  | 1.478063  | -2.139200 | 2.691674  |
| H  | 1.623082  | 3.505973  | 0.172738  | C  | 0.149436  | -2.546912 | 2.984717  |
| H  | -0.806081 | 3.537028  | -0.986040 | Si | -0.559876 | -3.853072 | 1.817834  |
| H  | -0.940190 | 1.475555  | -2.709547 | C  | -0.717812 | -2.239842 | 4.082509  |
| H  | 1.402905  | 0.157116  | -2.603268 | C  | -0.625858 | -1.426476 | 5.224680  |
| H  | 2.976499  | 1.396778  | -0.807578 | C  | 0.273682  | -0.442029 | 5.697711  |
| C  | 1.375103  | -2.105300 | -0.708286 | C  | 1.509128  | 0.095395  | 5.272587  |
| O  | 1.135477  | -3.089134 | -1.519136 | H  | 1.809030  | 0.947393  | 5.880311  |
| U  | 3.357026  | -3.811602 | -1.578113 | H  | -0.135825 | 0.108328  | 6.541296  |
| C  | 6.037687  | -3.407318 | -2.017064 | H  | -1.546029 | -1.438124 | 5.804188  |
| H  | 6.491216  | -5.416459 | -2.223314 | H  | -1.689870 | -2.725157 | 4.011475  |
| C  | 5.399241  | -2.128052 | -2.067620 | H  | 1.841440  | -2.550649 | 1.752631  |
| C  | 4.338093  | -1.636401 | -2.881360 | H  | 3.267157  | -1.129429 | 2.547260  |
| C  | 3.415175  | -2.191553 | -3.799993 | C  | -1.407472 | 2.375212  | 2.255871  |
| H  | 4.103756  | -0.592864 | -2.683021 | C  | -2.260873 | 1.276531  | 1.978768  |
| C  | 3.062759  | -3.480349 | -4.282146 | C  | -2.674404 | 0.719262  | 3.214608  |
| C  | 3.628120  | -4.769434 | -4.059918 | C  | -2.077507 | 1.478360  | 4.255727  |
| C  | 1.835463  | -1.452650 | 0.251691  | C  | -1.295731 | 2.503536  | 3.662515  |
| C  | 4.789209  | -5.240490 | -3.399208 | H  | -0.733488 | 3.264007  | 4.191190  |
| C  | 5.808265  | -4.661704 | -2.606050 | H  | -2.216329 | 1.318406  | 5.316645  |
| H  | 3.058832  | -5.583215 | -4.505718 | H  | -3.344839 | -0.121086 | 3.343846  |
| H  | 4.883492  | -6.321649 | -3.462718 | H  | -2.546413 | 0.925108  | 0.995644  |
| Si | 1.526417  | -3.513463 | -5.384625 | H  | -0.913651 | 2.996282  | 1.521007  |
| H  | 2.693556  | -1.434996 | -4.102127 | C  | -0.020858 | -0.156543 | -0.136602 |
| Si | 6.258416  | -0.814820 | -1.012968 | O  | -0.606804 | -0.920018 | -1.010276 |
| H  | 6.853356  | -3.448939 | -1.297296 | U  | 0.078741  | -0.083626 | -3.045992 |
| C  | 4.428235  | -5.113505 | 0.630756  | C  | 0.276624  | 2.293304  | -4.306421 |
| C  | 3.304984  | -4.403330 | 1.123810  | H  | 1.024295  | 1.544664  | -6.094374 |
| C  | 2.137589  | -5.005246 | 0.588579  | C  | -0.521056 | 2.549009  | -3.145790 |
| C  | 2.534550  | -6.092164 | -0.228963 | C  | -1.714285 | 1.939119  | -2.674815 |
| C  | 3.951387  | -6.158865 | -0.205200 | C  | -2.507562 | 0.816321  | -3.021735 |
| H  | 4.562498  | -6.894394 | -0.711808 | H  | -2.050254 | 2.361174  | -1.730019 |
| H  | 1.872298  | -6.765162 | -0.760661 | C  | -2.460243 | -0.239727 | -3.968065 |
| H  | 1.121080  | -4.680488 | 0.764240  | C  | -1.591403 | -0.478575 | -5.078938 |
| H  | 3.329112  | -3.555949 | 1.797910  | C  | 0.767849  | 0.581974  | 0.474052  |
| H  | 5.464972  | -4.912924 | 0.869217  | C  | -0.552046 | 0.253833  | -5.705065 |
| O  | 2.046631  | -0.462456 | 1.051924  | C  | 0.196371  | 1.408362  | -5.402890 |
| H  | 5.320539  | 0.309054  | -0.719529 | H  | -1.784526 | -1.420575 | -5.588695 |
| H  | 6.741321  | -1.416163 | 0.268360  | H  | -0.156821 | -0.271241 | -6.571313 |
| H  | 7.447491  | -0.259021 | -1.733809 | Si | -3.809339 | -1.548160 | -3.758217 |
| H  | 0.722172  | -4.744917 | -5.111895 | H  | -3.259625 | 0.644565  | -2.254371 |
| H  | 0.691304  | -2.297261 | -5.152248 | Si | 0.070624  | 4.042293  | -2.146076 |
| H  | 1.916946  | -3.542605 | -6.830901 | H  | 1.150307  | 2.939195  | -4.376845 |
| H  | -2.664329 | -2.340572 | -1.903048 | C  | 2.699219  | -0.608565 | -2.342818 |
| H  | -1.790881 | -3.817677 | -0.153080 | C  | 2.017492  | -1.841650 | -2.184384 |
| H  | -4.083740 | -3.030769 | -0.077453 | C  | 1.657762  | -2.317317 | -3.470015 |
| H  | -0.219521 | 1.095298  | 5.840237  | C  | 2.122021  | -1.376884 | -4.427202 |
| H  | 1.499282  | -0.255128 | 4.791791  | C  | 2.765274  | -0.320504 | -3.730480 |
| H  | 1.404974  | 2.159837  | 4.407561  | H  | 3.244037  | 0.539434  | -4.181600 |

### 5-6-TS

SCF (B3PW91) Energy = -1328.089480

Enthalpy 0K = -1327.576205

Enthalpy 298K = -1327.534421

Free Energy 298K = -1327.656297

Negative frequency = -21.3 cm<sup>-1</sup>

U 0.044930 0.161245 3.022138

C 2.446215 -0.235336 4.245529

Si 4.013305 0.819388 4.281756

C 2.411294 -1.208625 3.214453

|    |           |           |           |   |           |           |           |
|----|-----------|-----------|-----------|---|-----------|-----------|-----------|
| C  | 1.478063  | -2.139200 | 2.691674  | H | 2.028294  | -1.464101 | -5.501796 |
| C  | 0.149436  | -2.546912 | 2.984717  | H | 1.147548  | -3.248654 | -3.686259 |
| Si | -0.559876 | -3.853072 | 1.817834  | H | 1.792540  | -2.322548 | -1.242072 |
| C  | -0.717812 | -2.239842 | 4.082509  | H | 3.108658  | -0.003419 | -1.543344 |
| C  | -0.625858 | -1.426476 | 5.224680  | O | 1.303098  | 1.309667  | 1.400300  |
| C  | 0.273682  | -0.442029 | 5.697711  | H | -0.506339 | 4.003075  | -0.770615 |
| C  | 1.509128  | 0.095395  | 5.272587  | H | 1.564051  | 4.059107  | -2.077154 |
| H  | 1.809030  | 0.947393  | 5.880311  | H | -0.369842 | 5.311263  | -2.807843 |
| H  | -0.135825 | 0.108328  | 6.541296  | H | -3.284503 | -2.890169 | -4.161689 |
| H  | -1.546029 | -1.438124 | 5.804188  | H | -4.276535 | -1.589989 | -2.340642 |
| H  | -1.689870 | -2.725157 | 4.011475  | H | -4.983543 | -1.238716 | -4.634412 |
| H  | 1.841440  | -2.550649 | 1.752631  |   |           |           |           |
| H  | 3.267157  | -1.129429 | 2.547260  |   |           |           |           |
| C  | -1.407472 | 2.375212  | 2.255871  |   |           |           |           |
| C  | -2.260873 | 1.276531  | 1.978768  |   |           |           |           |
| C  | -2.674404 | 0.719262  | 3.214608  |   |           |           |           |
| C  | -2.077507 | 1.478360  | 4.255727  |   |           |           |           |
| C  | -1.295731 | 2.503536  | 3.662515  |   |           |           |           |
| H  | -0.733488 | 3.264007  | 4.191190  |   |           |           |           |
| H  | -2.216329 | 1.318406  | 5.316645  |   |           |           |           |
| H  | -3.344839 | -0.121086 | 3.343846  |   |           |           |           |
| H  | -2.546413 | 0.925108  | 0.995644  |   |           |           |           |
| H  | -0.913651 | 2.996282  | 1.521007  |   |           |           |           |
| C  | -0.020858 | -0.156543 | -0.136602 |   |           |           |           |
| O  | -0.606804 | -0.920018 | -1.010276 |   |           |           |           |
| U  | 0.078741  | -0.083626 | -3.045992 |   |           |           |           |
| C  | 0.276624  | 2.293304  | -4.306421 |   |           |           |           |
| H  | 1.024295  | 1.544664  | -6.094374 |   |           |           |           |
| C  | -0.521056 | 2.549009  | -3.145790 |   |           |           |           |
| C  | -1.714285 | 1.939119  | -2.674815 |   |           |           |           |
| C  | -2.507562 | 0.816321  | -3.021735 |   |           |           |           |
| H  | -2.050254 | 2.361174  | -1.730019 |   |           |           |           |
| C  | -2.460243 | -0.239727 | -3.968065 |   |           |           |           |
| C  | -1.591403 | -0.478575 | -5.078938 |   |           |           |           |
| C  | 0.767849  | 0.581974  | 0.474052  |   |           |           |           |
| C  | -0.552046 | 0.253833  | -5.705065 |   |           |           |           |
| C  | 0.196371  | 1.408362  | -5.402890 |   |           |           |           |
| H  | -1.784526 | -1.420575 | -5.588695 |   |           |           |           |
| H  | -0.156821 | -0.271241 | -6.571313 |   |           |           |           |
| Si | -3.809339 | -1.548160 | -3.758217 |   |           |           |           |
| H  | -3.259625 | 0.644565  | -2.254371 |   |           |           |           |
| Si | 0.070624  | 4.042293  | -2.146076 |   |           |           |           |
| H  | 1.150307  | 2.939195  | -4.376845 |   |           |           |           |
| C  | 2.699219  | -0.608565 | -2.342818 |   |           |           |           |
| C  | 2.017492  | -1.841650 | -2.184384 |   |           |           |           |
| C  | 1.657762  | -2.317317 | -3.470015 |   |           |           |           |
| C  | 2.122021  | -1.376884 | -4.427202 |   |           |           |           |
| C  | 2.765274  | -0.320504 | -3.730480 |   |           |           |           |
| H  | 3.244037  | 0.539434  | -4.181600 |   |           |           |           |
| H  | 2.028294  | -1.464101 | -5.501796 |   |           |           |           |
| H  | 1.147548  | -3.248654 | -3.686259 |   |           |           |           |
| H  | 1.792540  | -2.322548 | -1.242072 |   |           |           |           |
| H  | 3.108658  | -0.003419 | -1.543344 |   |           |           |           |
| O  | 1.303098  | 1.309667  | 1.400300  |   |           |           |           |
| H  | -0.506339 | 4.003075  | -0.770615 |   |           |           |           |
| H  | 1.564051  | 4.059107  | -2.077154 |   |           |           |           |
| H  | -0.369842 | 5.311263  | -2.807843 |   |           |           |           |
| H  | -3.284503 | -2.890169 | -4.161689 |   |           |           |           |
| H  | -4.276535 | -1.589989 | -2.340642 |   |           |           |           |
| H  | -4.983543 | -1.238716 | -4.634412 |   |           |           |           |



|   |           |           |          |
|---|-----------|-----------|----------|
| H | -2.018704 | -3.615888 | 1.588076 |
| H | 0.169882  | -3.841755 | 0.515604 |
| H | -0.417539 | -5.217185 | 2.422107 |
| H | 4.978610  | 0.297949  | 5.302847 |
| H | 4.687697  | 0.800682  | 2.949592 |
| H | 3.681701  | 2.228221  | 4.663410 |

## 6

SCF (B3PW91) Energy = -1328.093317  
Enthalpy 0K = -1327.579157  
Enthalpy 298K = -1327.536880  
Free Energy 298K = -1327.658972

|    |           |           |           |
|----|-----------|-----------|-----------|
| U  | 0.262535  | 0.201693  | 3.239064  |
| C  | 2.261465  | -0.983662 | 4.648777  |
| Si | 3.918094  | -0.308922 | 5.256953  |
| C  | 2.310726  | -1.614352 | 3.380233  |
| C  | 1.383538  | -2.170765 | 2.463097  |
| C  | -0.020307 | -2.373794 | 2.402583  |
| Si | -0.623628 | -3.158789 | 0.800448  |
| C  | -1.054044 | -2.194190 | 3.378296  |
| C  | -1.089441 | -1.764507 | 4.715396  |
| C  | -0.169551 | -1.170624 | 5.612188  |
| C  | 1.187830  | -0.792340 | 5.574604  |
| H  | 1.472514  | -0.222324 | 6.457259  |
| H  | -0.660888 | -0.811789 | 6.513473  |
| H  | -2.103540 | -1.742523 | 5.107427  |
| H  | -2.047215 | -2.432313 | 3.002121  |
| H  | 1.874494  | -2.377511 | 1.513893  |
| H  | 3.287706  | -1.520571 | 2.910689  |
| C  | -0.517805 | 2.851836  | 3.154640  |
| C  | -1.490360 | 2.170868  | 2.379037  |
| C  | -2.267632 | 1.369344  | 3.252732  |
| C  | -1.774027 | 1.558361  | 4.570059  |
| C  | -0.691407 | 2.475221  | 4.509488  |
| H  | -0.119137 | 2.842129  | 5.353085  |
| H  | -2.171747 | 1.103716  | 5.467430  |
| H  | -3.107236 | 0.745051  | 2.972597  |
| H  | -1.617045 | 2.255071  | 1.307751  |
| H  | 0.236236  | 3.527385  | 2.773515  |
| C  | 0.623608  | 0.755087  | 0.191985  |
| O  | -0.015996 | 0.489266  | -0.897986 |
| U  | 0.089814  | 0.180925  | -3.116456 |
| C  | -0.347696 | 1.937038  | -5.093176 |
| H  | 0.363547  | 0.748144  | -6.639787 |
| C  | -1.072182 | 2.447298  | -3.966665 |
| C  | -2.069460 | 1.852723  | -3.149327 |
| C  | -2.622361 | 0.559917  | -2.971235 |
| H  | -2.400102 | 2.513960  | -2.350964 |
| C  | -2.434780 | -0.737686 | -3.515202 |
| C  | -1.648173 | -1.199030 | -4.619187 |
| C  | 1.431066  | 1.132618  | 1.049730  |
| C  | -0.870390 | -0.569031 | -5.618681 |
| C  | -0.345454 | 0.722907  | -5.815684 |
| H  | -1.689465 | -2.277856 | -4.759017 |
| H  | -0.464579 | -1.286053 | -6.328126 |
| Si | -3.502259 | -2.087154 | -2.732246 |
| H  | -3.253295 | 0.545348  | -2.084843 |
| Si | -0.720569 | 4.267313  | -3.588914 |
| H  | 0.361670  | 2.651320  | -5.506875 |
| C  | 2.817062  | 0.450082  | -2.814433 |

|   |           |           |           |
|---|-----------|-----------|-----------|
| C | 2.478178  | -0.706683 | -2.068030 |
| C | 2.097500  | -1.723784 | -2.978313 |
| C | 2.206096  | -1.196386 | -4.292572 |
| C | 2.653373  | 0.146658  | -4.190961 |
| H | 2.858046  | 0.812515  | -5.019634 |
| H | 2.014101  | -1.734043 | -5.211978 |
| H | 1.807832  | -2.735434 | -2.719403 |
| H | 2.493736  | -0.779248 | -0.987483 |
| H | 3.166901  | 1.389026  | -2.401488 |
| O | 1.979667  | 1.405653  | 2.187517  |
| H | -1.028893 | 4.565499  | -2.158230 |
| H | 0.715329  | 4.576646  | -3.873130 |
| H | -1.560556 | 5.156589  | -4.451564 |
| H | -2.759269 | -3.385454 | -2.708693 |
| H | -3.894756 | -1.696800 | -1.345640 |
| H | -4.748352 | -2.293400 | -3.536338 |
| H | -2.032921 | -2.747920 | 0.517987  |
| H | 0.247561  | -2.759723 | -0.349313 |
| H | -0.595631 | -4.654736 | 0.885653  |
| H | 4.576142  | -1.281456 | 6.188577  |
| H | 4.839137  | -0.066725 | 4.107193  |
| H | 3.711577  | 0.963344  | 6.018280  |

## 6-7-TS

SCF (B3PW91) Energy = -1328.090357  
Enthalpy 0K = -1327.576718  
Enthalpy 298K = -1327.534944  
Free Energy 298K = -1327.657733  
Negative frequency = -18.7 cm<sup>-1</sup>

|    |           |           |           |
|----|-----------|-----------|-----------|
| U  | 0.294994  | -0.028128 | 3.778587  |
| C  | 2.214725  | -1.030260 | 5.374726  |
| Si | 3.879963  | -0.331921 | 5.933297  |
| C  | 2.274576  | -1.855804 | 4.220050  |
| C  | 1.350468  | -2.524663 | 3.379489  |
| C  | -0.058913 | -2.663779 | 3.285269  |
| Si | -0.659163 | -3.605223 | 1.759261  |
| C  | -1.111098 | -2.268115 | 4.171172  |
| C  | -1.161828 | -1.701278 | 5.468586  |
| C  | -0.241024 | -1.069319 | 6.322794  |
| C  | 1.121305  | -0.695926 | 6.237684  |
| H  | 1.401776  | -0.017376 | 7.041233  |
| H  | -0.731720 | -0.606676 | 7.175927  |
| H  | -2.183472 | -1.606394 | 5.828444  |
| H  | -2.105290 | -2.492012 | 3.788769  |
| H  | 1.858704  | -2.887321 | 2.488355  |
| H  | 3.264867  | -1.867697 | 3.769511  |
| C  | -0.597716 | 2.411731  | 2.839828  |
| C  | -1.774750 | 1.636703  | 2.982807  |
| C  | -2.004207 | 1.439716  | 4.370574  |
| C  | -0.965025 | 2.092329  | 5.082945  |
| C  | -0.093137 | 2.689759  | 4.135007  |
| H  | 0.786822  | 3.280793  | 4.361089  |
| H  | -0.867461 | 2.143576  | 6.159992  |
| H  | -2.839076 | 0.909154  | 4.809888  |
| H  | -2.401066 | 1.281843  | 2.173127  |
| H  | -0.152445 | 2.709079  | 1.899191  |
| C  | 0.467369  | 0.500571  | -0.327679 |
| O  | -0.051577 | 0.533947  | -1.513326 |
| U  | 0.081126  | 0.382741  | -3.712073 |
| C  | -0.430442 | 2.365364  | -5.449963 |

|    |           |           |           |
|----|-----------|-----------|-----------|
| H  | 0.427271  | 1.465832  | -7.116418 |
| C  | -1.255062 | 2.654240  | -4.314339 |
| C  | -2.216555 | 1.867649  | -3.627812 |
| C  | -2.645636 | 0.516888  | -3.631541 |
| H  | -2.628859 | 2.384293  | -2.763426 |
| C  | -2.319107 | -0.672474 | -4.336261 |
| C  | -1.495684 | -0.893303 | -5.488611 |
| C  | 0.981111  | 0.452981  | 0.774760  |
| C  | -0.749588 | -0.065673 | -6.355047 |
| C  | -0.304421 | 1.271302  | -6.335975 |
| H  | -1.441815 | -1.939500 | -5.784207 |
| H  | -0.272239 | -0.638177 | -7.146814 |
| Si | -3.224805 | -2.217697 | -3.734055 |
| H  | -3.283262 | 0.325927  | -2.770580 |
| Si | -1.080379 | 4.423497  | -3.673118 |
| H  | 0.233140  | 3.184416  | -5.721223 |
| C  | 2.837377  | 0.647148  | -3.630948 |
| C  | 2.533406  | -0.365015 | -2.687409 |
| C  | 2.076187  | -1.503817 | -3.397170 |
| C  | 2.108746  | -1.200140 | -4.784009 |
| C  | 2.577767  | 0.130390  | -4.928646 |
| H  | 2.734836  | 0.650203  | -5.864800 |
| H  | 1.843057  | -1.871548 | -5.590586 |
| H  | 1.785083  | -2.450614 | -2.957341 |
| H  | 2.604059  | -0.274069 | -1.609629 |
| H  | 3.231691  | 1.630676  | -3.403307 |
| O  | 1.525408  | 0.442552  | 1.959083  |
| H  | -1.461068 | 4.494012  | -2.230338 |
| H  | 0.330839  | 4.891245  | -3.845991 |
| H  | -1.964423 | 5.359028  | -4.438974 |
| H  | -2.369592 | -3.428159 | -3.942664 |
| H  | -3.567288 | -2.087774 | -2.285520 |
| H  | -4.495326 | -2.423424 | -4.499805 |
| H  | -1.986504 | -3.075685 | 1.317353  |
| H  | 0.332876  | -3.489522 | 0.649353  |
| H  | -0.837382 | -5.057924 | 2.079840  |
| H  | 4.526516  | -1.235463 | 6.937266  |
| H  | 4.801065  | -0.188776 | 4.766218  |
| H  | 3.679846  | 1.000982  | 6.583852  |

## 7

SCF (B3PW91) Energy = -1328.093450

Enthalpy 0K = -1327.579284

Enthalpy 298K = -1327.536724

Free Energy 298K = -1327.661627

|    |           |           |          |
|----|-----------|-----------|----------|
| U  | -0.057567 | -0.401318 | 3.965960 |
| C  | 2.367141  | -1.186215 | 4.853991 |
| Si | 4.120522  | -0.664404 | 4.381015 |
| C  | 1.880359  | -2.320208 | 4.151463 |
| C  | 0.661656  | -3.037829 | 4.058720 |
| C  | -0.637910 | -2.953296 | 4.623794 |
| Si | -1.887970 | -4.181786 | 3.916608 |
| C  | -1.154523 | -2.149130 | 5.691639 |
| C  | -0.599664 | -1.212558 | 6.591842 |
| C  | 0.612310  | -0.499806 | 6.685264 |
| C  | 1.794798  | -0.414327 | 5.917764 |
| H  | 2.423515  | 0.415648  | 6.234723 |
| H  | 0.564074  | 0.281011  | 7.440610 |
| H  | -1.341235 | -0.842113 | 7.295513 |
| H  | -2.214973 | -2.309051 | 5.877796 |

|    |           |           |           |
|----|-----------|-----------|-----------|
| H  | 0.703377  | -3.732622 | 3.222261  |
| H  | 2.559202  | -2.640319 | 3.363416  |
| C  | -1.318649 | 1.709283  | 2.711661  |
| C  | -2.313581 | 1.152719  | 3.553032  |
| C  | -1.952243 | 1.424722  | 4.899853  |
| C  | -0.730661 | 2.144588  | 4.888409  |
| C  | -0.336838 | 2.315856  | 3.534698  |
| H  | 0.542561  | 2.845923  | 3.187699  |
| H  | -0.204716 | 2.517380  | 5.758085  |
| H  | -2.523056 | 1.155532  | 5.779122  |
| H  | -3.210109 | 0.639859  | 3.224401  |
| H  | -1.291949 | 1.650120  | 1.629642  |
| C  | -0.148805 | -0.003798 | -0.598415 |
| O  | -0.349008 | 0.317631  | -1.835572 |
| U  | 0.223481  | 0.592682  | -3.944459 |
| C  | -0.109460 | 2.785603  | -5.467078 |
| H  | 1.108757  | 2.189107  | -7.041510 |
| C  | -1.146218 | 2.858940  | -4.479908 |
| C  | -2.155211 | 1.931583  | -4.109269 |
| C  | -2.472405 | 0.578381  | -4.386580 |
| H  | -2.761096 | 2.291225  | -3.279930 |
| C  | -1.929229 | -0.475892 | -5.167435 |
| C  | -0.884178 | -0.484504 | -6.148149 |
| C  | 0.053319  | -0.322319 | 0.556538  |
| C  | -0.056791 | 0.499960  | -6.731678 |
| C  | 0.263244  | 1.843411  | -6.451492 |
| H  | -0.691558 | -1.471895 | -6.563372 |
| H  | 0.604927  | 0.075910  | -7.483165 |
| Si | -2.805580 | -2.137745 | -4.960953 |
| H  | -3.243094 | 0.230465  | -3.701535 |
| Si | -1.244102 | 4.524265  | -3.592543 |
| H  | 0.523658  | 3.670542  | -5.494289 |
| C  | 2.837705  | 0.938703  | -3.106954 |
| C  | 2.446800  | -0.321528 | -2.589333 |
| C  | 2.302487  | -1.217363 | -3.677722 |
| C  | 2.615080  | -0.512340 | -4.871035 |
| C  | 2.946650  | 0.820268  | -4.518071 |
| H  | 3.254348  | 1.601289  | -5.201663 |
| H  | 2.622623  | -0.925389 | -5.871429 |
| H  | 2.033368  | -2.265049 | -3.608498 |
| H  | 2.257508  | -0.548359 | -1.546492 |
| H  | 3.049545  | 1.826584  | -2.522605 |
| O  | 0.238317  | -0.651546 | 1.794245  |
| H  | -3.259500 | -3.583251 | 3.939752  |
| H  | -1.521944 | -4.547551 | 2.515539  |
| H  | -1.926601 | -5.434434 | 4.736692  |
| H  | 5.133174  | -1.346879 | 5.248056  |
| H  | 4.405008  | -1.022781 | 2.958688  |
| H  | 4.282522  | 0.811432  | 4.571138  |
| H  | -1.862797 | 4.361783  | -2.242283 |
| H  | 0.126527  | 5.109363  | -3.451634 |
| H  | -2.072815 | 5.497054  | -4.373593 |
| H  | -3.914548 | -2.281789 | -5.957199 |
| H  | -1.839210 | -3.256715 | -5.193346 |
| H  | -3.388765 | -2.252678 | -3.590435 |

## 8

SCF (B3PW91) Energy = -1214.755619

Enthalpy 0K = -1214.252277

Enthalpy 298K = -1214.211629

Free Energy 298K = -1214.332446  
U -0.312263 -0.273923 -0.197973  
C -2.043645 1.819909 -0.129859  
C -1.438555 1.995729 -1.418637  
C -1.259149 1.184818 -2.548384  
C -1.475268 -0.178393 -2.868315  
C -1.963097 -1.303877 -2.184813  
C -2.612052 -1.524426 -0.924389  
C -2.983457 -0.633729 0.121489  
C -2.751355 0.727411 0.447654  
C 2.248483 0.698388 -0.549881  
C 2.001609 -0.098780 -1.696616  
C 2.327213 -0.166568 0.573288  
C 2.130272 -1.505638 0.111836  
C 1.926895 -1.457947 -1.291578  
C -0.041045 -1.012168 1.993825  
O 0.075606 -1.404518 3.160292  
H -3.461431 -1.145705 0.955321  
H -3.098123 0.939826 1.457694  
Si -2.046023 3.379370 0.925735  
H -2.130503 3.033225 2.380611  
H -0.980374 2.975653 -1.544715  
H -0.713676 1.701880 -3.335432  
H -1.045733 -0.442137 -3.832519  
H -1.810899 -2.220960 -2.752349  
H -4.482907 -3.595586 -1.267562  
Si -3.147370 -3.306645 -0.648370  
H -3.264078 -3.600474 0.816338  
H -2.163910 -4.258821 -1.256815  
H 1.768916 -2.307766 -1.944091  
H 2.189423 -2.402114 0.713550  
H 2.567262 0.128658 1.585378  
H 1.893934 0.266470 -2.710285  
H 2.375654 1.773948 -0.537813  
H -3.214495 4.265239 0.609581  
H -0.805151 4.184100 0.688373  
U 0.278062 -2.144415 5.336157  
C 2.606689 -0.896574 5.915097  
C 1.954653 -1.132763 7.168474  
C 1.464039 -2.277526 7.835205  
C 1.223825 -3.624871 7.485718  
C 1.355250 -4.408849 6.319324  
C 1.965537 -4.221462 5.037042  
C 2.675310 -3.119438 4.487505  
C 2.939425 -1.773163 4.848527  
C -1.906010 -0.971610 6.567289  
C -1.940247 -2.324882 6.997251  
C -2.176387 -0.950347 5.176237  
C -2.385232 -2.290595 4.747291  
C -2.243968 -3.139141 5.873871  
H 2.993119 -3.300607 3.462611  
H 3.402266 -1.249120 4.014657  
Si 3.198563 0.886782 5.693496  
H 3.365421 1.196304 4.241762  
H 1.818218 -0.230647 7.761941  
H 1.042489 -2.030349 8.806487  
H 0.669140 -4.148374 8.260676  
H 0.871745 -5.377674 6.429153  
H 3.074015 -6.657564 4.227384  
Si 1.916636 -5.756673 3.930736

H 1.984287 -5.355376 2.493528  
H 0.657224 -6.522315 4.184623  
H -2.370477 -4.215049 5.882789  
H -2.626933 -2.601989 3.738659  
H -2.232439 -0.069051 4.549406  
H -1.792093 -2.672482 8.011405  
H -1.730144 -0.108187 7.197461  
H 4.513412 1.094784 6.377205  
H 2.209495 1.829027 6.303016

### 8-9-TS

SCF (B3PW91) Energy = -1214.752519  
Enthalpy 0K = -1214.249163  
Enthalpy 298K = -1214.209486  
Free Energy 298K = -1214.326402  
Negative frequency = -69.8754 cm<sup>-1</sup>  
U 0.136574 -0.095837 0.137665  
U -0.071964 -0.003187 5.732780  
C 2.791803 -0.247704 -0.458608  
C 2.668299 0.921759 0.338773  
C 1.790935 2.030728 0.434675  
C 0.655813 2.508529 -0.281140  
C 0.041861 2.053744 -1.489443  
C 0.271267 1.010784 -2.415378  
C 1.066663 -0.149099 -2.438892  
C 2.067095 -0.705978 -1.597152  
Si 4.157380 -1.436429 0.098006  
Si -0.110964 4.096172 0.406740  
C -1.559781 -2.244151 0.434391  
C -2.127973 -1.192496 1.201950  
C -2.612363 -0.205144 0.308676  
C -2.336288 -0.642660 -1.014006  
C -1.689490 -1.904811 -0.934868  
H 3.732202 -2.849440 -0.146485  
H 5.409578 -1.193032 -0.685209  
H 4.458489 -1.235432 1.546624  
H 0.134867 4.195019 1.876618  
H -1.582037 4.104552 0.139449  
H 0.489387 5.295967 -0.255281  
H 3.337754 0.904647 1.196490  
H 1.996612 2.606493 1.334816  
H -0.834088 2.638514 -1.765052  
H -0.462716 1.015500 -3.217379  
H 0.796800 -0.820199 -3.250696  
H 2.356689 -1.702532 -1.925477  
H -1.119862 -3.151870 0.830044  
H -2.173441 -1.141976 2.283075  
H -3.127497 0.706779 0.585518  
H -2.602251 -0.121536 -1.924377  
H -1.375893 -2.510920 -1.775846  
C 1.141233 2.187166 4.583419  
C 2.203754 1.268516 4.850120  
C 2.362927 1.184388 6.257748  
C 1.406652 2.044833 6.856888  
C 0.650811 2.662968 5.827217  
C -0.239232 -2.540458 6.668658  
C 0.208647 -1.796008 7.809669  
C -0.280821 -0.695534 8.535709  
C -1.324304 0.247892 8.367615  
C -2.304609 0.503202 7.400059



|    |           |           |          |
|----|-----------|-----------|----------|
| C  | -2.752550 | -0.167127 | 6.213461 |
| C  | -2.394299 | -1.417433 | 5.633787 |
| C  | -1.370643 | -2.382336 | 5.819269 |
| Si | 0.827005  | -4.041912 | 6.276777 |
| Si | -4.208001 | 0.675091  | 5.366768 |
| H  | 1.146890  | -2.167372 | 8.219786 |
| H  | 0.372423  | -0.434721 | 9.365746 |
| H  | -1.275075 | 1.038671  | 9.113632 |
| H  | -2.811928 | 1.450836  | 7.573555 |
| H  | -2.964924 | -1.640761 | 4.733205 |
| H  | -1.400097 | -3.124330 | 5.022843 |
| H  | 2.271477  | -3.751421 | 6.547018 |
| H  | 0.450640  | -5.224551 | 7.119527 |
| H  | 0.666202  | -4.440935 | 4.843228 |
| H  | -4.148210 | 2.158481  | 5.565392 |
| H  | -5.524231 | 0.204380  | 5.910171 |
| H  | -4.206265 | 0.382880  | 3.897177 |
| H  | 2.822115  | 0.777501  | 4.111317 |
| H  | 3.100243  | 0.588944  | 6.781980 |
| H  | 1.279135  | 2.206759  | 7.919826 |
| H  | -0.141903 | 3.387503  | 5.966997 |
| H  | 0.811954  | 2.514339  | 3.607300 |
| C  | 0.346283  | -0.448334 | 3.480538 |
| O  | 0.620878  | -0.772369 | 2.314092 |

### 9

SCF (B3PW91) Energy = -1214.782966

Enthalpy 0K = -1214.278882

Enthalpy 298K = -1214.238743

Free Energy 298K = -1214.355316

|    |           |           |           |
|----|-----------|-----------|-----------|
| U  | 8.139769  | 9.415989  | 3.379330  |
| U  | 10.702851 | 5.789952  | 1.506579  |
| C  | 9.721413  | 11.515288 | 2.634672  |
| C  | 10.527858 | 10.748269 | 3.516654  |
| C  | 10.375963 | 10.118245 | 4.778162  |
| C  | 9.339154  | 9.953195  | 5.736866  |
| C  | 8.041964  | 10.550689 | 5.834645  |
| C  | 7.330694  | 11.506326 | 5.082598  |
| C  | 7.503568  | 12.183803 | 3.851859  |
| C  | 8.438311  | 12.128945 | 2.808151  |
| Si | 10.545145 | 11.942780 | 0.991457  |
| Si | 9.786861  | 8.854923  | 7.204286  |
| C  | 6.321684  | 8.299905  | 1.624406  |
| C  | 6.300128  | 7.454661  | 2.765846  |
| C  | 5.696356  | 8.171202  | 3.830454  |
| C  | 5.353121  | 9.458821  | 3.348526  |
| C  | 5.740122  | 9.539049  | 1.983315  |
| H  | 9.527729  | 12.003699 | -0.104334 |
| H  | 11.220299 | 13.278824 | 1.054205  |
| H  | 11.581663 | 10.920430 | 0.647241  |
| H  | 10.826620 | 7.854569  | 6.810355  |
| H  | 8.572810  | 8.140571  | 7.709336  |
| H  | 10.338215 | 9.666458  | 8.336362  |
| H  | 11.472985 | 10.454800 | 3.064745  |
| H  | 11.247822 | 9.506347  | 5.000555  |
| H  | 7.461913  | 10.188092 | 6.681363  |
| H  | 6.348928  | 11.697036 | 5.510281  |
| H  | 6.622771  | 12.762786 | 3.583536  |
| H  | 8.101585  | 12.677603 | 1.929799  |
| H  | 6.712855  | 8.044479  | 0.647892  |

|    |           |           |           |
|----|-----------|-----------|-----------|
| H  | 6.651542  | 6.432952  | 2.812654  |
| H  | 5.509447  | 7.792774  | 4.828227  |
| H  | 4.857003  | 10.237382 | 3.912170  |
| H  | 5.591696  | 10.389538 | 1.329473  |
| C  | 12.315692 | 6.921081  | 3.436266  |
| C  | 12.688240 | 7.572686  | 2.230214  |
| C  | 13.353561 | 6.631601  | 1.408960  |
| C  | 13.395660 | 5.395646  | 2.109581  |
| C  | 12.758029 | 5.575677  | 3.362055  |
| C  | 9.602234  | 5.764450  | -0.996212 |
| C  | 10.900649 | 5.193931  | -1.201578 |
| C  | 11.600878 | 4.109787  | -0.651157 |
| C  | 11.420876 | 3.265648  | 0.469767  |
| C  | 10.450227 | 3.090425  | 1.475946  |
| C  | 9.136241  | 3.606465  | 1.711916  |
| C  | 8.346175  | 4.528001  | 0.970900  |
| C  | 8.538697  | 5.404614  | -0.127251 |
| Si | 9.193190  | 7.152956  | -2.206257 |
| Si | 8.257909  | 2.829501  | 3.190561  |
| H  | 11.481588 | 5.710210  | -1.964592 |
| H  | 12.589086 | 3.993470  | -1.090281 |
| H  | 12.308404 | 2.668643  | 0.667585  |
| H  | 10.791384 | 2.409192  | 2.253265  |
| H  | 7.375620  | 4.706429  | 1.429540  |
| H  | 7.673660  | 6.054424  | -0.241237 |
| H  | 10.396936 | 8.006315  | -2.456252 |
| H  | 8.747551  | 6.606060  | -3.528032 |
| H  | 8.088139  | 8.005361  | -1.667096 |
| H  | 9.251513  | 2.465242  | 4.248320  |
| H  | 7.536686  | 1.577896  | 2.793725  |
| H  | 7.250049  | 3.777688  | 3.758038  |
| H  | 12.501196 | 8.609245  | 1.980303  |
| H  | 13.779827 | 6.823209  | 0.431896  |
| H  | 13.860113 | 4.484490  | 1.757229  |
| H  | 12.648955 | 4.825459  | 4.135857  |
| H  | 11.813426 | 7.374120  | 4.280038  |
| C  | 9.327581  | 7.260122  | 2.976063  |
| O  | 9.509639  | 7.949659  | 1.894373  |

### 9<sub>CO</sub>

SCF (B3PW91) Energy = -1328.042597

Enthalpy 0K = -1327.532864

Enthalpy 298K = -1327.488552

Free Energy 298K = -1327.617393

|    |           |           |          |
|----|-----------|-----------|----------|
| U  | 8.158531  | 9.416162  | 3.439478 |
| U  | 10.723603 | 5.812583  | 1.518263 |
| C  | 9.663102  | 11.489465 | 2.481955 |
| C  | 10.513514 | 10.812688 | 3.395061 |
| C  | 10.415242 | 10.275478 | 4.703985 |
| C  | 9.411849  | 10.169552 | 5.706731 |
| C  | 8.107902  | 10.752463 | 5.800460 |
| C  | 7.348409  | 11.626212 | 4.996679 |
| C  | 7.458431  | 12.193467 | 3.706448 |
| C  | 8.361018  | 12.065839 | 2.638658 |
| Si | 10.436239 | 11.819891 | 0.792667 |
| Si | 9.938466  | 9.221422  | 7.249881 |
| C  | 6.256301  | 8.183301  | 1.859281 |
| C  | 6.390629  | 7.344237  | 2.997400 |
| C  | 5.845984  | 8.028692  | 4.114069 |
| C  | 5.382216  | 9.290196  | 3.667010 |

|    |           |           |           |
|----|-----------|-----------|-----------|
| C  | 5.636669  | 9.387081  | 2.271588  |
| H  | 9.388048  | 11.808676 | -0.275106 |
| H  | 11.101815 | 13.161773 | 0.757054  |
| H  | 11.473288 | 10.787872 | 0.480864  |
| H  | 10.981887 | 8.206688  | 6.905028  |
| H  | 8.759802  | 8.538449  | 7.867276  |
| H  | 10.519816 | 10.145664 | 8.275310  |
| H  | 11.452940 | 10.507867 | 2.938217  |
| H  | 11.306817 | 9.699658  | 4.944501  |
| H  | 7.565066  | 10.450598 | 6.694454  |
| H  | 6.378888  | 11.834302 | 5.443963  |
| H  | 6.553111  | 12.722902 | 3.418469  |
| H  | 7.981771  | 12.524414 | 1.726714  |
| H  | 6.567889  | 7.944993  | 0.850175  |
| H  | 6.799194  | 6.342804  | 3.009838  |
| H  | 5.776730  | 7.643702  | 5.124284  |
| H  | 4.895136  | 10.040803 | 4.274827  |
| H  | 5.377091  | 10.223700 | 1.634815  |
| C  | 12.383423 | 7.023532  | 3.356038  |
| C  | 12.716749 | 7.630690  | 2.115918  |
| C  | 13.360148 | 6.660618  | 1.311442  |
| C  | 13.431910 | 5.452815  | 2.058729  |
| C  | 12.832233 | 5.678239  | 3.321377  |
| C  | 9.739441  | 5.854825  | -1.024797 |
| C  | 11.018725 | 5.231503  | -1.193615 |
| C  | 11.665679 | 4.129455  | -0.618323 |
| C  | 11.421947 | 3.288270  | 0.493384  |
| C  | 10.393525 | 3.122633  | 1.442663  |
| C  | 9.074241  | 3.654392  | 1.602059  |
| C  | 8.352999  | 4.622190  | 0.850335  |
| C  | 8.623403  | 5.519113  | -0.213711 |
| Si | 9.433442  | 7.279923  | -2.224289 |
| Si | 8.065163  | 2.811116  | 2.952510  |
| H  | 11.646207 | 5.733230  | -1.928814 |
| H  | 12.668106 | 3.989536  | -1.016694 |
| H  | 12.288102 | 2.675585  | 0.733127  |
| H  | 10.672754 | 2.420640  | 2.226032  |
| H  | 7.363648  | 4.814744  | 1.262124  |
| H  | 7.790180  | 6.205677  | -0.348179 |
| H  | 10.682549 | 8.080523  | -2.419455 |
| H  | 9.010982  | 6.771074  | -3.568820 |
| H  | 8.348913  | 8.170946  | -1.707644 |
| H  | 8.963505  | 2.310966  | 4.039357  |
| H  | 7.314820  | 1.636151  | 2.404947  |
| H  | 7.062767  | 3.757511  | 3.533680  |
| H  | 12.516187 | 8.655649  | 1.830952  |
| H  | 13.749780 | 6.814530  | 0.312963  |
| H  | 13.889658 | 4.530515  | 1.727044  |
| H  | 12.738142 | 4.957602  | 4.123978  |
| H  | 11.906321 | 7.507701  | 4.197330  |
| O  | 8.964077  | 5.310958  | 6.166992  |
| C  | 9.898653  | 5.038241  | 5.580123  |
| C  | 9.389861  | 7.285123  | 3.033815  |
| O  | 9.492105  | 7.944594  | 1.924602  |

#### 9<sub>co</sub>-10-TS

|                       |              |
|-----------------------|--------------|
| SCF (B3PW91) Energy = | -1328.031412 |
| Enthalpy 0K =         | -1327.520801 |
| Enthalpy 298K =       | -1327.478176 |
| Free Energy 298K =    | -1327.600173 |

|                      |           |                            |           |
|----------------------|-----------|----------------------------|-----------|
| Negative frequency = |           | -205.5292 cm <sup>-1</sup> |           |
| U                    | 8.148497  | 9.327663                   | 3.509866  |
| U                    | 10.747603 | 5.777268                   | 1.474174  |
| C                    | 9.709206  | 11.408022                  | 2.706162  |
| C                    | 10.509170 | 10.709812                  | 3.647025  |
| C                    | 10.336368 | 10.163511                  | 4.944722  |
| C                    | 9.283428  | 10.041129                  | 5.889121  |
| C                    | 7.955396  | 10.577110                  | 5.903719  |
| C                    | 7.240888  | 11.472033                  | 5.084351  |
| C                    | 7.444464  | 12.091446                  | 3.828966  |
| C                    | 8.412210  | 12.008096                  | 2.818099  |
| Si                   | 10.561329 | 11.767399                  | 1.061213  |
| Si                   | 9.741134  | 9.179666                   | 7.504439  |
| C                    | 6.420740  | 8.347179                   | 1.590751  |
| C                    | 6.303991  | 7.441582                   | 2.677402  |
| C                    | 5.653667  | 8.114018                   | 3.742921  |
| C                    | 5.368631  | 9.434246                   | 3.313315  |
| C                    | 5.845839  | 9.580072                   | 1.983532  |
| H                    | 9.566535  | 11.758456                  | -0.056734 |
| H                    | 11.213943 | 13.115767                  | 1.073656  |
| H                    | 11.620611 | 10.748073                  | 0.786842  |
| H                    | 10.978459 | 8.360787                   | 7.330727  |
| H                    | 8.618668  | 8.310866                   | 7.977881  |
| H                    | 10.001864 | 10.197660                  | 8.571987  |
| H                    | 11.462919 | 10.393215                  | 3.229234  |
| H                    | 11.214134 | 9.588501                   | 5.233866  |
| H                    | 7.364563  | 10.246250                  | 6.756799  |
| H                    | 6.238527  | 11.652732                  | 5.465801  |
| H                    | 6.560052  | 12.633575                  | 3.501530  |
| H                    | 8.088399  | 12.504263                  | 1.904451  |
| H                    | 6.865869  | 8.138159                   | 0.626527  |
| H                    | 6.635585  | 6.413251                   | 2.692414  |
| H                    | 5.392533  | 7.684197                   | 4.702388  |
| H                    | 4.851401  | 10.191371                  | 3.886575  |
| H                    | 5.761798  | 10.468964                  | 1.371429  |
| C                    | 12.557239 | 7.198157                   | 3.012363  |
| C                    | 12.936382 | 7.470289                   | 1.673390  |
| C                    | 13.466449 | 6.279840                   | 1.121235  |
| C                    | 13.422111 | 5.272721                   | 2.124755  |
| C                    | 12.865941 | 5.843265                   | 3.293810  |
| C                    | 9.566630  | 5.859294                   | -0.962025 |
| C                    | 10.841282 | 5.261646                   | -1.229595 |
| C                    | 11.542223 | 4.155565                   | -0.723891 |
| C                    | 11.395452 | 3.276292                   | 0.375038  |
| C                    | 10.449999 | 3.078078                   | 1.398671  |
| C                    | 9.138291  | 3.585166                   | 1.660218  |
| C                    | 8.346312  | 4.539038                   | 0.971544  |
| C                    | 8.521684  | 5.477087                   | -0.078284 |
| Si                   | 9.145443  | 7.284031                   | -2.125230 |
| Si                   | 8.279712  | 2.766297                   | 3.130035  |
| H                    | 11.415142 | 5.794046                   | -1.986382 |
| H                    | 12.518635 | 4.048768                   | -1.190977 |
| H                    | 12.288895 | 2.676077                   | 0.529698  |
| H                    | 10.798419 | 2.366406                   | 2.144867  |
| H                    | 7.387199  | 4.703464                   | 1.457931  |
| H                    | 7.658671  | 6.135719                   | -0.141714 |
| H                    | 10.371199 | 8.084689                   | -2.432598 |
| H                    | 8.594560  | 6.776266                   | -3.421903 |
| H                    | 8.115629  | 8.175209                   | -1.507192 |
| H                    | 9.285582  | 2.396999                   | 4.172993  |

|   |           |          |          |
|---|-----------|----------|----------|
| H | 7.583321  | 1.509505 | 2.704931 |
| H | 7.255876  | 3.684625 | 3.714626 |
| H | 12.843070 | 8.423338 | 1.166695 |
| H | 13.856906 | 6.159862 | 0.118754 |
| H | 13.778251 | 4.256608 | 2.018829 |
| H | 12.717610 | 5.340685 | 4.241848 |
| H | 12.115760 | 7.899921 | 3.705464 |
| O | 9.612879  | 5.813812 | 5.708450 |
| C | 10.071778 | 6.626097 | 5.039798 |
| C | 9.248359  | 7.075829 | 3.084082 |
| O | 9.688534  | 7.899860 | 2.177124 |

## 10

SCF (B3PW91) Energy = -1328.089833

Enthalpy 0K = -1327.575867

Enthalpy 298K = -1327.533755

Free Energy 298K = -1327.653534

|    |           |           |           |
|----|-----------|-----------|-----------|
| U  | 8.148007  | 9.271388  | 3.507225  |
| U  | 10.708596 | 5.846316  | 1.467428  |
| C  | 9.696759  | 11.354055 | 2.721538  |
| C  | 10.509259 | 10.670986 | 3.661867  |
| C  | 10.351966 | 10.110279 | 4.956457  |
| C  | 9.310841  | 9.961349  | 5.906532  |
| C  | 7.972968  | 10.467878 | 5.929878  |
| C  | 7.230636  | 11.348313 | 5.118086  |
| C  | 7.400733  | 11.935346 | 3.844178  |
| C  | 8.371679  | 11.886293 | 2.825312  |
| Si | 10.552282 | 11.763448 | 1.089283  |
| Si | 9.783196  | 9.088367  | 7.520297  |
| C  | 6.441100  | 8.136780  | 1.686743  |
| C  | 6.314899  | 7.328246  | 2.845880  |
| C  | 5.647164  | 8.086917  | 3.838864  |
| C  | 5.359929  | 9.362439  | 3.291844  |
| C  | 5.853106  | 9.396036  | 1.960684  |
| H  | 9.555666  | 11.785035 | -0.026559 |
| H  | 11.202145 | 13.111273 | 1.145414  |
| H  | 11.613464 | 10.754155 | 0.787573  |
| H  | 11.139434 | 8.481726  | 7.409795  |
| H  | 8.768002  | 8.057604  | 7.895926  |
| H  | 9.803046  | 10.107934 | 8.619279  |
| H  | 11.472729 | 10.386352 | 3.244121  |
| H  | 11.246019 | 9.557907  | 5.240499  |
| H  | 7.399105  | 10.134929 | 6.793718  |
| H  | 6.227709  | 11.508166 | 5.506082  |
| H  | 6.491848  | 12.428450 | 3.506934  |
| H  | 8.021024  | 12.357100 | 1.908929  |
| H  | 6.908223  | 7.848228  | 0.755438  |
| H  | 6.680553  | 6.318938  | 2.964357  |
| H  | 5.380840  | 7.743372  | 4.831114  |
| H  | 4.832307  | 10.163514 | 3.791385  |
| H  | 5.767294  | 10.226040 | 1.270704  |
| C  | 12.956945 | 7.481213  | 1.500733  |
| C  | 13.445766 | 6.230550  | 1.051782  |
| C  | 13.372601 | 5.313813  | 2.135925  |
| C  | 12.844772 | 6.000098  | 3.255942  |
| C  | 12.582713 | 7.335713  | 2.859614  |
| C  | 9.639930  | 5.908158  | -1.011550 |
| C  | 10.902895 | 5.262322  | -1.187789 |
| C  | 11.532152 | 4.139892  | -0.614973 |
| C  | 11.298071 | 3.287798  | 0.484617  |

|    |           |          |           |
|----|-----------|----------|-----------|
| C  | 10.299399 | 3.175196 | 1.475168  |
| C  | 8.988768  | 3.717894 | 1.638699  |
| C  | 8.272824  | 4.681555 | 0.885958  |
| C  | 8.534846  | 5.579038 | -0.180368 |
| Si | 9.321832  | 7.320317 | -2.223823 |
| Si | 8.049095  | 2.986764 | 3.105949  |
| H  | 11.543451 | 5.757671 | -1.914940 |
| H  | 12.526369 | 3.987359 | -1.028815 |
| H  | 12.157319 | 2.657463 | 0.699200  |
| H  | 10.584619 | 2.478320 | 2.261600  |
| H  | 7.293153  | 4.889402 | 1.310175  |
| H  | 7.696477  | 6.257313 | -0.316017 |
| H  | 10.601331 | 8.028827 | -2.537214 |
| H  | 8.752074  | 6.806919 | -3.509599 |
| H  | 8.344653  | 8.292632 | -1.642725 |
| H  | 8.979137  | 2.745575 | 4.251163  |
| H  | 7.437011  | 1.670638 | 2.733850  |
| H  | 6.947651  | 3.902383 | 3.531288  |
| H  | 13.831999 | 6.016282 | 0.064077  |
| H  | 13.695016 | 4.281181 | 2.116390  |
| H  | 12.678886 | 5.587678 | 4.243757  |
| H  | 12.167044 | 8.112528 | 3.485922  |
| H  | 12.900125 | 8.392812 | 0.918122  |
| O  | 10.358068 | 6.286193 | 5.632380  |
| C  | 10.041316 | 6.724610 | 4.576007  |
| C  | 9.388136  | 6.954499 | 3.451158  |
| O  | 9.670869  | 7.805127 | 2.364043  |

## 10CO

SCF (B3PW91) Energy = -1441.349751

Enthalpy 0K = -1440.830159

Enthalpy 298K = -1440.783802

Free Energy 298K = -1440.918002

|    |           |           |           |
|----|-----------|-----------|-----------|
| U  | 8.154393  | 9.299135  | 3.475630  |
| U  | 10.705304 | 5.830145  | 1.490185  |
| C  | 9.735063  | 11.364072 | 2.721543  |
| C  | 10.530427 | 10.667080 | 3.666891  |
| C  | 10.350479 | 10.101961 | 4.956477  |
| C  | 9.297575  | 9.962219  | 5.895093  |
| C  | 7.964652  | 10.481102 | 5.904768  |
| C  | 7.240985  | 11.374363 | 5.089532  |
| C  | 7.432873  | 11.966872 | 3.821539  |
| C  | 8.415515  | 11.912438 | 2.814034  |
| Si | 10.610521 | 11.774181 | 1.100022  |
| Si | 9.743357  | 9.084229  | 7.513627  |
| C  | 6.464299  | 8.243889  | 1.593422  |
| C  | 6.334036  | 7.387766  | 2.717714  |
| C  | 5.654765  | 8.101579  | 3.736532  |
| C  | 5.367163  | 9.397439  | 3.241215  |
| C  | 5.870110  | 9.488167  | 1.916280  |
| H  | 9.628351  | 11.793048 | -0.028620 |
| H  | 11.256709 | 13.123419 | 1.162941  |
| H  | 11.677331 | 10.766972 | 0.812611  |
| H  | 11.093542 | 8.461247  | 7.417243  |
| H  | 8.712177  | 8.067871  | 7.883964  |
| H  | 9.767779  | 10.106816 | 8.609847  |
| H  | 11.494103 | 10.370514 | 3.258050  |
| H  | 11.234522 | 9.538009  | 5.248828  |
| H  | 7.377080  | 10.150425 | 6.760244  |
| H  | 6.235771  | 11.543860 | 5.467325  |

|                              |                            |           |           |    |           |           |           |
|------------------------------|----------------------------|-----------|-----------|----|-----------|-----------|-----------|
| H                            | 6.533334                   | 12.471400 | 3.476234  | C  | 7.406987  | 11.899399 | 3.694676  |
| H                            | 8.080293                   | 12.390476 | 1.895560  | C  | 8.265303  | 11.687544 | 2.588979  |
| H                            | 6.942360                   | 7.997788  | 0.654947  | Si | 10.265148 | 11.372931 | 0.667715  |
| H                            | 6.710003                   | 6.378998  | 2.801074  | Si | 10.208204 | 9.432176  | 7.367629  |
| H                            | 5.385187                   | 7.716405  | 4.712424  | C  | 6.333363  | 8.136075  | 1.893240  |
| H                            | 4.833115                   | 10.175564 | 3.769551  | C  | 6.392077  | 7.240483  | 2.993962  |
| H                            | 5.786465                   | 10.346054 | 1.261150  | C  | 5.762793  | 7.863156  | 4.101064  |
| C                            | 12.907430                  | 7.518882  | 1.600618  | C  | 5.336495  | 9.148896  | 3.694795  |
| C                            | 13.413733                  | 6.322671  | 1.038503  | C  | 5.686533  | 9.317283  | 2.326220  |
| C                            | 13.393197                  | 5.321821  | 2.047921  | H  | 9.150257  | 11.358362 | -0.327565 |
| C                            | 12.878176                  | 5.899140  | 3.233743  | H  | 10.978632 | 12.683268 | 0.548507  |
| C                            | 12.573882                  | 7.255018  | 2.952777  | H  | 11.241495 | 10.287100 | 0.348217  |
| C                            | 9.573690                   | 5.886806  | -0.963872 | H  | 11.075003 | 8.259890  | 7.038156  |
| C                            | 10.851347                  | 5.277523  | -1.168929 | H  | 9.077614  | 9.019294  | 8.250032  |
| C                            | 11.519833                  | 4.164940  | -0.621977 | H  | 11.053574 | 10.412006 | 8.124673  |
| C                            | 11.327006                  | 3.293901  | 0.471614  | H  | 11.412127 | 10.252418 | 2.873791  |
| C                            | 10.354772                  | 3.146531  | 1.482126  | H  | 11.398754 | 9.708845  | 4.966632  |
| C                            | 9.036961                   | 3.660276  | 1.682280  | H  | 7.752935  | 10.532291 | 6.844639  |
| C                            | 8.281156                   | 4.609687  | 0.951346  | H  | 6.427175  | 11.729392 | 5.517881  |
| C                            | 8.496289                   | 5.523773  | -0.111801 | H  | 6.461466  | 12.338709 | 3.385232  |
| Si                           | 9.196311                   | 7.294632  | -2.162126 | H  | 7.804608  | 12.010316 | 1.657701  |
| Si                           | 8.141037                   | 2.898104  | 3.161563  | H  | 6.706510  | 7.949683  | 0.894356  |
| H                            | 11.463453                  | 5.794800  | -1.905373 | H  | 6.837146  | 6.254284  | 2.992404  |
| H                            | 12.510402                  | 4.044252  | -1.054648 | H  | 5.648846  | 7.433133  | 5.087821  |
| H                            | 12.205168                  | 2.681676  | 0.660180  | H  | 4.812105  | 9.869654  | 4.308543  |
| H                            | 10.673897                  | 2.449284  | 2.254974  | H  | 5.469116  | 10.184577 | 1.716129  |
| H                            | 7.304541                   | 4.784529  | 1.395775  | C  | 12.880753 | 7.610633  | 1.993975  |
| H                            | 7.636153                   | 6.180673  | -0.220277 | C  | 13.479805 | 6.558334  | 1.259054  |
| H                            | 10.445707                  | 8.052452  | -2.482058 | C  | 13.607934 | 5.438147  | 2.123941  |
| H                            | 8.632911                   | 6.771530  | -3.446752 | C  | 13.087533 | 5.799059  | 3.388716  |
| H                            | 8.191370                   | 8.227411  | -1.564641 | C  | 12.631702 | 7.138230  | 3.307054  |
| H                            | 9.099366                   | 2.663407  | 4.285202  | C  | 9.866875  | 6.059688  | -0.821077 |
| H                            | 7.546721                   | 1.573169  | 2.791935  | C  | 11.118813 | 5.423138  | -1.070328 |
| H                            | 7.033369                   | 3.792672  | 3.614602  | C  | 11.774402 | 4.290749  | -0.559252 |
| H                            | 13.783762                  | 6.200146  | 0.028958  | C  | 11.543538 | 3.352573  | 0.471166  |
| H                            | 13.734190                  | 4.301440  | 1.935145  | C  | 10.491604 | 3.087310  | 1.376843  |
| H                            | 12.753301                  | 5.394838  | 4.184469  | C  | 9.157536  | 3.570331  | 1.523346  |
| H                            | 12.158053                  | 7.970911  | 3.647900  | C  | 8.458446  | 4.629956  | 0.888363  |
| H                            | 12.806922                  | 8.471714  | 1.095130  | C  | 8.744556  | 5.657551  | -0.040758 |
| O                            | 10.250376                  | 6.287798  | 5.656585  | Si | 9.540774  | 7.563149  | -1.911267 |
| C                            | 9.974637                   | 6.725005  | 4.586976  | Si | 8.138325  | 2.620573  | 2.791895  |
| C                            | 9.358698                   | 6.958554  | 3.443223  | H  | 11.753506 | 5.978667  | -1.758387 |
| O                            | 9.672384                   | 7.805422  | 2.363542  | H  | 12.782329 | 4.198442  | -0.958537 |
| C                            | 12.429446                  | 4.086861  | 6.650307  | H  | 12.417739 | 2.737679  | 0.669931  |
| O                            | 12.007495                  | 3.829685  | 7.673404  | H  | 10.755262 | 2.307119  | 2.088885  |
| <b>10<sub>co</sub>-11-TS</b> |                            |           |           | H  | 7.465972  | 4.777001  | 1.310408  |
| SCF (B3PW91) Energy =        | -1441.325917               |           |           | H  | 7.918481  | 6.362144  | -0.098527 |
| Enthalpy 0K =                | -1440.806126               |           |           | H  | 10.812792 | 8.298124  | -2.191959 |
| Enthalpy 298K =              | -1440.761321               |           |           | H  | 8.944986  | 7.160378  | -3.225360 |
| Free Energy 298K =           | -1440.887702               |           |           | H  | 8.572766  | 8.488073  | -1.241418 |
| Negative frequency =         | -250.9400 cm <sup>-1</sup> |           |           | H  | 9.009415  | 2.124545  | 3.903648  |
| U                            | 8.139518                   | 9.245172  | 3.654170  | H  | 7.489040  | 1.421289  | 2.169849  |
| U                            | 10.846100                  | 5.747420  | 1.707401  | H  | 7.052342  | 3.480043  | 3.356680  |
| C                            | 9.578057                   | 11.153280 | 2.413238  | H  | 13.804646 | 6.605709  | 0.227864  |
| C                            | 10.497338                  | 10.602039 | 3.346489  | H  | 14.047956 | 4.484455  | 1.864118  |
| C                            | 10.481379                  | 10.238318 | 4.714650  | H  | 13.050359 | 5.167822  | 4.267965  |
| C                            | 9.554086                   | 10.244997 | 5.788838  | H  | 12.164696 | 7.692699  | 4.108172  |
| C                            | 8.228342                   | 10.750958 | 5.890962  | H  | 12.663677 | 8.601679  | 1.615072  |
| C                            | 7.381031                   | 11.508759 | 5.045602  | O  | 8.409064  | 7.205193  | 5.715283  |
|                              |                            |           |           | C  | 9.077121  | 6.585073  | 4.914017  |

|   |           |          |          |
|---|-----------|----------|----------|
| C | 9.647702  | 6.343732 | 3.745861 |
| O | 9.525237  | 7.464603 | 2.845051 |
| C | 9.931126  | 4.802564 | 5.772612 |
| O | 10.739889 | 4.039813 | 6.023117 |

## 11

SCF (B3PW91) Energy = -1441.394669  
Enthalpy 0K = -1440.871192  
Enthalpy 298K = -1440.827219  
Free Energy 298K = -1440.951862

|    |           |           |           |
|----|-----------|-----------|-----------|
| U  | 8.038940  | 9.284756  | 3.822479  |
| U  | 10.953921 | 5.603087  | 1.703831  |
| C  | 9.294301  | 11.329065 | 2.479951  |
| C  | 10.315736 | 10.646330 | 3.212382  |
| C  | 10.510318 | 10.256767 | 4.553804  |
| C  | 9.762688  | 10.278814 | 5.766930  |
| C  | 8.462405  | 10.734512 | 6.089032  |
| C  | 7.448279  | 11.438157 | 5.388675  |
| C  | 7.325340  | 11.967837 | 4.087086  |
| C  | 8.077138  | 11.927478 | 2.894521  |
| Si | 9.722968  | 11.631035 | 0.669251  |
| Si | 10.637140 | 9.395079  | 7.186852  |
| C  | 6.520557  | 8.319177  | 1.703499  |
| C  | 6.300122  | 7.411178  | 2.772322  |
| C  | 5.519125  | 8.067743  | 3.753711  |
| C  | 5.273997  | 9.386591  | 3.306008  |
| C  | 5.889143  | 9.540940  | 2.033269  |
| H  | 8.480194  | 11.712599 | -0.160586 |
| H  | 10.472896 | 12.915995 | 0.493365  |
| H  | 10.591884 | 10.528010 | 0.150611  |
| H  | 11.297419 | 8.132145  | 6.722734  |
| H  | 9.671539  | 9.070241  | 8.279913  |
| H  | 11.721200 | 10.256413 | 7.761353  |
| H  | 11.130132 | 10.303544 | 2.578549  |
| H  | 11.440800 | 9.697986  | 4.650324  |
| H  | 8.141904  | 10.466906 | 7.093263  |
| H  | 6.554783  | 11.587163 | 5.989644  |
| H  | 6.348697  | 12.419391 | 3.928306  |
| H  | 7.518670  | 12.366673 | 2.069754  |
| H  | 7.068214  | 8.116133  | 0.791871  |
| H  | 6.657302  | 6.391353  | 2.829080  |
| H  | 5.191825  | 7.640242  | 4.693152  |
| H  | 4.697736  | 10.139970 | 3.827958  |
| H  | 5.862500  | 10.429791 | 1.417080  |
| C  | 12.803284 | 7.543839  | 2.385198  |
| C  | 13.456064 | 6.760162  | 1.403608  |
| C  | 13.726610 | 5.486279  | 1.974813  |
| C  | 13.241644 | 5.486950  | 3.305103  |
| C  | 12.666028 | 6.757554  | 3.558495  |
| C  | 9.943269  | 5.887936  | -0.807232 |
| C  | 11.212391 | 5.280990  | -1.060320 |
| C  | 11.901172 | 4.173553  | -0.543997 |
| C  | 11.699312 | 3.243254  | 0.503597  |
| C  | 10.659963 | 2.956105  | 1.416946  |
| C  | 9.317133  | 3.415978  | 1.579215  |
| C  | 8.586599  | 4.451617  | 0.938173  |
| C  | 8.838589  | 5.470976  | -0.011954 |
| Si | 9.585917  | 7.374043  | -1.919063 |
| Si | 8.327493  | 2.448745  | 2.862590  |
| H  | 11.824535 | 5.842625  | -1.763706 |

|   |           |          |           |
|---|-----------|----------|-----------|
| H | 12.908144 | 4.101587 | -0.949244 |
| H | 12.591411 | 2.656044 | 0.706601  |
| H | 10.948946 | 2.191519 | 2.135380  |
| H | 7.598427  | 4.587644 | 1.374673  |
| H | 7.996464  | 6.156696 | -0.066999 |
| H | 10.837952 | 8.155332 | -2.159962 |
| H | 9.060661  | 6.924764 | -3.247042 |
| H | 8.557255  | 8.257128 | -1.289906 |
| H | 9.239194  | 1.917601 | 3.922953  |
| H | 7.632425  | 1.282688 | 2.230611  |
| H | 7.283834  | 3.320210 | 3.485942  |
| H | 13.727997 | 7.080756 | 0.405761  |
| H | 14.240037 | 4.669201 | 1.486044  |
| H | 13.316973 | 4.668638 | 4.011093  |
| H | 12.229564 | 7.082077 | 4.493387  |
| H | 12.478257 | 8.569107 | 2.264821  |
| O | 8.256927  | 7.497666 | 5.276944  |
| C | 8.975912  | 6.442597 | 4.902298  |
| C | 9.648007  | 6.324438 | 3.666511  |
| O | 9.497489  | 7.353721 | 2.863660  |
| C | 9.170521  | 5.354944 | 5.704432  |
| O | 9.342598  | 4.430308 | 6.383401  |

## 11-12-TS

SCF (B3PW91) Energy = -1441.382900  
Enthalpy 0K = -1440.860055  
Enthalpy 298K = -1440.816534  
Free Energy 298K = -1440.942735  
Negative frequency = -82.4147 cm<sup>-1</sup>

|    |           |           |          |
|----|-----------|-----------|----------|
| U  | 8.008526  | 9.972013  | 4.330992 |
| U  | 11.221202 | 5.176143  | 0.692060 |
| C  | 9.696839  | 12.076906 | 4.437223 |
| C  | 10.038449 | 11.315837 | 5.585188 |
| C  | 9.351872  | 10.633013 | 6.620334 |
| C  | 8.002075  | 10.400649 | 6.993346 |
| C  | 6.776884  | 10.958010 | 6.500215 |
| C  | 6.442552  | 11.935540 | 5.537017 |
| C  | 7.124151  | 12.605245 | 4.500414 |
| C  | 8.439181  | 12.594130 | 3.984225 |
| Si | 11.168960 | 12.591073 | 3.367562 |
| Si | 7.785040  | 9.235632  | 8.466768 |
| C  | 7.281932  | 8.702575  | 1.999643 |
| C  | 6.662392  | 7.952428  | 3.033677 |
| C  | 5.626715  | 8.739768  | 3.595583 |
| C  | 5.606821  | 9.982747  | 2.909042 |
| C  | 6.626458  | 9.956493  | 1.920771 |
| H  | 10.748811 | 12.693287 | 1.935209 |
| H  | 11.685695 | 13.931634 | 3.788612 |
| H  | 12.277683 | 11.598156 | 3.499218 |
| H  | 8.907899  | 8.251337  | 8.516631 |
| H  | 6.482263  | 8.508591  | 8.352289 |
| H  | 7.770746  | 10.001160 | 9.753103 |
| H  | 11.093233 | 11.048640 | 5.602849 |
| H  | 10.047571 | 10.008654 | 7.177531 |
| H  | 5.892763  | 10.557545 | 6.992541 |
| H  | 5.368141  | 12.093158 | 5.481728 |
| H  | 6.440829  | 13.145550 | 3.849635 |
| H  | 8.507679  | 13.131086 | 3.040117 |
| H  | 8.116859  | 8.367386  | 1.393494 |
| H  | 6.935386  | 6.948275  | 3.334572 |



|                       |           |           |              |    |           |           |           |
|-----------------------|-----------|-----------|--------------|----|-----------|-----------|-----------|
| H                     | 4.947643  | 8.437725  | 4.384009     | C  | 6.076124  | 7.552882  | 4.493198  |
| H                     | 4.914372  | 10.794765 | 3.087343     | C  | 6.436081  | 7.632629  | 5.864241  |
| H                     | 6.846951  | 10.747663 | 1.214262     | C  | 5.795595  | 8.764581  | 6.414139  |
| C                     | 13.202053 | 7.083263  | 0.317928     | C  | 5.023344  | 9.377891  | 5.384455  |
| C                     | 13.524005 | 6.043679  | -0.587822    | H  | 8.855855  | 12.314027 | 0.676930  |
| C                     | 13.944110 | 4.917936  | 0.172898     | H  | 11.040556 | 12.832280 | 1.599868  |
| C                     | 13.879728 | 5.264249  | 1.545547     | H  | 10.445808 | 10.539761 | 1.210206  |
| C                     | 13.417948 | 6.602116  | 1.634043     | H  | 10.633429 | 8.843433  | 8.041225  |
| C                     | 9.434861  | 4.801220  | -1.308288    | H  | 8.563579  | 9.514242  | 9.150395  |
| C                     | 10.600672 | 4.106269  | -1.766451    | H  | 10.484956 | 10.976330 | 9.171035  |
| C                     | 11.443231 | 3.118763  | -1.228756    | H  | 10.976052 | 10.758180 | 3.825004  |
| C                     | 11.599701 | 2.479279  | 0.024002     | H  | 10.916144 | 10.102226 | 5.891872  |
| C                     | 10.946361 | 2.532828  | 1.270270     | H  | 7.362869  | 11.232241 | 7.801772  |
| C                     | 9.737625  | 3.135202  | 1.745306     | H  | 6.003251  | 12.283853 | 6.430946  |
| C                     | 8.791019  | 3.984129  | 1.112937     | H  | 6.002064  | 12.836768 | 4.266740  |
| C                     | 8.664838  | 4.667809  | -0.122021    | H  | 7.445556  | 12.610654 | 2.579829  |
| Si                    | 8.713438  | 5.994241  | -2.581240    | H  | 4.741132  | 8.829767  | 3.241297  |
| Si                    | 9.258673  | 2.616774  | 3.495070     | H  | 6.393270  | 6.786979  | 3.797083  |
| H                     | 10.944465 | 4.440788  | -2.743644    | H  | 7.100298  | 6.955788  | 6.386482  |
| H                     | 12.268851 | 2.889210  | -1.898897    | H  | 5.861558  | 9.096238  | 7.442081  |
| H                     | 12.514991 | 1.893962  | 0.069440     | H  | 4.402303  | 10.257360 | 5.495775  |
| H                     | 11.476848 | 1.967882  | 2.034338     | C  | 12.609927 | 7.066707  | 1.877282  |
| H                     | 8.007836  | 4.307506  | 1.797215     | C  | 13.606182 | 6.387319  | 1.133346  |
| H                     | 7.833572  | 5.368847  | -0.082340    | C  | 13.747194 | 5.085572  | 1.685019  |
| H                     | 9.812610  | 6.658117  | -3.351132    | C  | 12.843734 | 4.968978  | 2.775207  |
| H                     | 7.849896  | 5.269786  | -3.568491    | C  | 12.138965 | 6.192510  | 2.892847  |
| H                     | 7.877044  | 7.034885  | -1.909722    | C  | 10.910878 | 5.063704  | -2.156206 |
| H                     | 10.476192 | 2.278659  | 4.293006     | C  | 12.218246 | 4.534925  | -1.901883 |
| H                     | 8.381051  | 1.402034  | 3.462735     | C  | 12.729334 | 3.460004  | -1.139102 |
| H                     | 8.490004  | 3.705965  | 4.174758     | C  | 12.225191 | 2.609872  | -0.134335 |
| H                     | 13.484936 | 6.101511  | -1.668597    | C  | 10.987377 | 2.453081  | 0.532611  |
| H                     | 14.279355 | 3.971187  | -0.228856    | C  | 9.654644  | 2.931575  | 0.313263  |
| H                     | 14.156211 | 4.628376  | 2.378007     | C  | 9.126742  | 3.820063  | -0.659485 |
| H                     | 13.278026 | 7.167848  | 2.545261     | C  | 9.635708  | 4.688321  | -1.657884 |
| H                     | 12.847528 | 8.072124  | 0.055676     | Si | 10.871938 | 6.430726  | -3.466002 |
| O                     | 9.522085  | 8.345613  | 4.247582     | Si | 8.362928  | 2.170746  | 1.468865  |
| C                     | 10.104050 | 7.286927  | 3.699389     | H  | 13.007182 | 5.062948  | -2.433910 |
| C                     | 10.399862 | 6.789475  | 2.435639     | H  | 13.808773 | 3.374446  | -1.237414 |
| O                     | 10.175156 | 7.251930  | 1.254563     | H  | 13.015540 | 2.038425  | 0.346484  |
| C                     | 10.760987 | 6.258359  | 4.341139     | H  | 11.072760 | 1.790209  | 1.391298  |
| O                     | 11.284419 | 5.466828  | 5.025110     | H  | 8.066123  | 4.011824  | -0.509856 |
| <b>12</b>             |           |           |              | H  | 8.841669  | 5.334305  | -2.026901 |
| SCF (B3PW91) Energy = |           |           | -1441.413622 | H  | 12.139546 | 7.222682  | -3.403991 |
| Enthalpy 0K =         |           |           | -1440.888463 | H  | 10.765953 | 5.837530  | -4.835756 |
| Enthalpy 298K =       |           |           | -1440.844907 | H  | 9.699111  | 7.326691  | -3.241993 |
| Free Energy 298K =    |           |           | -1440.971169 | H  | 8.983877  | 1.883374  | 2.799163  |
| U                     | 7.684841  | 9.794637  | 4.639197     | H  | 7.851905  | 0.880523  | 0.909221  |
| U                     | 11.231682 | 5.106843  | 0.515690     | H  | 7.209710  | 3.104522  | 1.638276  |
| C                     | 9.189150  | 11.773880 | 3.397126     | H  | 14.179467 | 6.795726  | 0.309729  |
| C                     | 10.073118 | 11.127430 | 4.311350     | H  | 14.447244 | 4.328779  | 1.356513  |
| C                     | 10.048038 | 10.714386 | 5.658053     | H  | 12.739326 | 4.108036  | 3.424532  |
| C                     | 9.113425  | 10.783988 | 6.733359     | H  | 11.397880 | 6.440055  | 3.645236  |
| C                     | 7.836367  | 11.398926 | 6.836338     | H  | 12.272723 | 8.083093  | 1.713749  |
| C                     | 6.960358  | 12.077149 | 5.958106     | O  | 7.404904  | 9.385089  | 2.126335  |
| C                     | 6.954185  | 12.422959 | 4.589168     | C  | 8.251357  | 8.447139  | 2.253575  |
| C                     | 7.877850  | 12.290805 | 3.524662     | C  | 9.102173  | 7.385694  | 1.909954  |
| Si                    | 9.896061  | 11.864101 | 1.649081     | O  | 9.591014  | 6.594698  | 1.011496  |
| Si                    | 9.723908  | 9.993549  | 8.333383     | C  | 9.051450  | 7.799689  | 3.247260  |
| C                     | 5.186145  | 8.619050  | 4.205189     | O  | 9.325182  | 7.832989  | 4.490980  |

**CO**

SCF (B3PW91) Energy = -113.258297  
 Enthalpy 0K = -113.253238  
 Enthalpy 298K = -113.250878  
 Free Energy 298K = -113.272375  
 C -0.033084 0.013350 2.235027  
 O -0.050778 0.017223 3.371896

**CO<sub>2</sub>**

SCF (B3PW91) Energy = -188.504221  
 Enthalpy 0K = -188.492487  
 Enthalpy 298K = -188.489853  
 Free Energy 298K = -188.513197  
 C -0.034873 0.006908 2.227722  
 O -0.050155 0.020640 3.395408  
 O -0.019591 -0.006825 1.060037

**U(η-C<sub>8</sub>H<sub>6</sub>{SiH<sub>3</sub>-1,4}2)(η-Cp)(η<sup>3</sup>-CO<sub>2</sub>) / small core**

SCF (B3PW91) Energy = -1178.804804  
 Enthalpy 0K = -1178.544491  
 Enthalpy 298K = -1178.522978  
 Free Energy 298K = -1178.597061  
 U -0.034385 -0.040478 0.151339  
 C 1.958136 0.251654 1.887396  
 C 0.769995 0.313809 2.663644  
 C -0.400472 1.107297 2.551327  
 C -0.934917 2.018773 1.616217  
 C -0.543004 2.558374 0.363802  
 C 0.666864 2.468652 -0.376295  
 C 1.909511 1.837730 -0.181338  
 C 2.440260 0.924884 0.748668  
 H 2.652129 -0.520512 2.217591  
 Si 0.768411 -0.888397 4.127531  
 H 1.592802 -0.335084 5.249088  
 H -0.623006 -1.104785 4.622393  
 H 1.376334 -2.195424 3.726314  
 H -1.150354 0.847454 3.296026  
 H -1.970798 2.246588 1.860204  
 Si -1.864892 3.617326 -0.484080  
 H -3.216215 3.302678 0.066118  
 H -1.848321 3.380101 -1.961432  
 H -1.585355 5.071566 -0.258905  
 H 0.621364 2.969597 -1.342499  
 H 2.574210 1.983198 -1.030070  
 H 3.412965 0.549243 0.439639  
 C 1.249709 -2.150416 -0.981441  
 C -0.112639 -2.324144 -1.331781  
 C -0.465227 -1.299328 -2.239803  
 C 0.676168 -0.489395 -2.454219  
 C 1.738450 -1.021989 -1.684220  
 H 1.822326 -2.784879 -0.315101  
 H -0.767580 -3.102031 -0.962265  
 H -1.443188 -1.151248 -2.679849  
 H 0.732655 0.371659 -3.108658  
 H 2.751690 -0.646926 -1.656755  
 O -1.583102 -1.640374 1.210745  
 C -2.540500 -1.100976 0.609387  
 O -2.467895 -0.191121 -0.247348

**U(η-C<sub>8</sub>H<sub>6</sub>{SiH<sub>3</sub>-1,4}2)(η-Cp)(η<sup>3</sup>-CO<sub>2</sub>) / large core**

SCF (B3PW91) Energy = -739.253274  
 Enthalpy 0K = -738.993131  
 Enthalpy 298K = -738.971622  
 Free Energy 298K = -739.045298  
 U -0.008259 -0.050556 0.099199  
 C 1.961559 0.264206 1.903041  
 C 0.760159 0.310761 2.678126  
 C -0.413005 1.096011 2.551987  
 C -0.948613 2.021567 1.618449  
 C -0.556979 2.589716 0.380354  
 C 0.665908 2.510290 -0.358615  
 C 1.912841 1.886047 -0.153230  
 C 2.445911 0.961395 0.777328  
 H 2.670818 -0.486479 2.247003  
 Si 0.774637 -0.853456 4.169824  
 H 1.525266 -0.230424 5.306490  
 H -0.619099 -1.138059 4.620393  
 H 1.471064 -2.130139 3.817856  
 H -1.168578 0.830123 3.288257  
 H -1.985172 2.242158 1.864587  
 Si -1.859206 3.700611 -0.426616  
 H -3.220875 3.356369 0.077206  
 H -1.809687 3.550893 -1.914596  
 H -1.582855 5.138306 -0.110026  
 H 0.633463 3.041550 -1.308073  
 H 2.588224 2.047940 -0.989877  
 H 3.424892 0.601431 0.470605  
 C 1.281954 -2.225570 -1.033479  
 C -0.089802 -2.405701 -1.341543  
 C -0.469807 -1.402492 -2.271027  
 C 0.663614 -0.596133 -2.534857  
 C 1.747565 -1.105386 -1.769394  
 H 1.876010 -2.849020 -0.376209  
 H -0.733212 -3.178058 -0.941249  
 H -1.456027 -1.275619 -2.698660  
 H 0.707157 0.241043 -3.220532  
 H 2.759891 -0.723971 -1.772604  
 O -1.667223 -1.632180 1.191643  
 C -2.600683 -1.106111 0.546179  
 O -2.519722 -0.167985 -0.276571

**2 Cp\***

SCF (B3PW91) Energy = -860.535076  
 Enthalpy 0K = -860.140938  
 Enthalpy 298K = -860.111765  
 Free Energy 298K = -860.200737  
 U -0.335881 -0.218945 -0.348165  
 C -2.616313 1.243270 -0.496502  
 C -2.032158 1.410360 -1.792714  
 C -1.559700 0.539738 -2.794805  
 C -1.327962 -0.849066 -2.910661  
 C -1.492368 -1.970387 -2.065578  
 C -2.145646 -2.202224 -0.814492  
 C -2.800149 -1.323176 0.091504  
 C -2.984946 0.075546 0.229655  
 C 1.818890 1.484286 -0.601137  
 C 1.905939 0.618985 -1.733170  
 C 2.090101 0.709343 0.568009

|                       |           |           |           |    |           |           |           |
|-----------------------|-----------|-----------|-----------|----|-----------|-----------|-----------|
| C                     | 2.337232  | -0.645582 | 0.153221  | Si | 4.135021  | 1.025927  | 2.436485  |
| C                     | 2.213980  | -0.698700 | -1.266829 | C  | -2.063841 | 1.951237  | 1.927106  |
| C                     | -0.134790 | -0.807533 | 2.012792  | C  | -2.772798 | 0.865073  | 2.529862  |
| O                     | -0.048600 | -1.089683 | 3.144636  | C  | -2.544084 | 0.921056  | 3.929962  |
| H                     | -3.142162 | -1.835745 | 0.988941  | C  | -1.693699 | 2.048987  | 4.196748  |
| H                     | -3.412476 | 0.305955  | 1.203897  | C  | -1.394083 | 2.678222  | 2.957497  |
| Si                    | -3.140552 | 2.860762  | 0.323912  | C  | -0.636333 | 3.960567  | 2.765890  |
| H                     | -3.172008 | 2.708933  | 1.811011  | C  | -1.392088 | 2.612794  | 5.551897  |
| H                     | -1.890885 | 2.454352  | -2.067653 | C  | -3.248235 | 0.092377  | 4.962784  |
| H                     | -1.158242 | 1.085941  | -3.645194 | C  | -3.690274 | -0.083987 | 1.815998  |
| H                     | -0.785720 | -1.099516 | -3.819864 | C  | -2.251132 | 2.436363  | 0.526050  |
| H                     | -1.040273 | -2.865906 | -2.489524 | C  | -0.497844 | -0.270268 | 0.193192  |
| H                     | -3.293060 | -4.753341 | -0.957569 | O  | -1.160211 | -0.646917 | -0.808632 |
| Si                    | -2.165842 | -4.018062 | -0.298318 | U  | 0.382432  | 0.063488  | -2.861179 |
| H                     | -2.333775 | -4.141755 | 1.181499  | C  | 1.205679  | 2.679498  | -3.037070 |
| H                     | -0.892803 | -4.687733 | -0.715145 | H  | 2.847102  | 2.066716  | -4.223561 |
| C                     | 2.520573  | -1.885893 | -2.134069 | C  | -0.126782 | 2.772732  | -2.567672 |
| C                     | 2.856184  | -1.754481 | 1.022926  | C  | -1.384239 | 2.186181  | -2.864240 |
| C                     | 2.335089  | 1.272260  | 1.938489  | C  | -1.903514 | 1.254120  | -3.797437 |
| C                     | 1.877123  | 1.048475  | -3.169260 | H  | -2.112009 | 2.456866  | -2.105577 |
| C                     | 1.632383  | 2.974179  | -0.641586 | C  | -1.315566 | 0.659687  | -4.955693 |
| H                     | -4.506831 | 3.279008  | -0.127032 | C  | -0.053498 | 0.732095  | -5.565238 |
| H                     | -2.191135 | 3.959013  | -0.042996 | C  | 1.218538  | 1.248382  | -5.220768 |
| H                     | 2.511040  | -2.736286 | 0.686077  | C  | 1.762766  | 1.992340  | -4.155795 |
| H                     | 3.954160  | -1.771579 | 1.006054  | H  | 0.001649  | 0.105415  | -6.450956 |
| H                     | 2.544709  | -1.641505 | 2.063520  | H  | 1.989566  | 0.903274  | -5.906392 |
| H                     | 2.180255  | 0.531298  | 2.725333  | H  | -1.986234 | -0.013596 | -5.487589 |
| H                     | 3.369975  | 1.630331  | 2.021255  | Si | -3.732004 | 0.842671  | -3.581905 |
| H                     | 1.679768  | 2.120179  | 2.156849  | H  | -0.194070 | 3.355892  | -1.652012 |
| H                     | 2.320416  | -2.829617 | -1.618730 | C  | 2.457758  | -1.674838 | -3.574606 |
| H                     | 1.932263  | -1.883675 | -3.056631 | C  | 2.154298  | -1.993152 | -2.220304 |
| H                     | 3.579270  | -1.896165 | -2.424725 | C  | 0.859490  | -2.599478 | -2.188130 |
| H                     | 1.480218  | 0.268971  | -3.825121 | C  | 0.359764  | -2.646617 | -3.522661 |
| H                     | 1.275022  | 1.948610  | -3.317084 | C  | 1.359637  | -2.102085 | -4.382695 |
| H                     | 2.893537  | 1.277487  | -3.515052 | C  | 1.369367  | -2.211777 | -5.876433 |
| H                     | 1.176309  | 3.353580  | 0.277492  | C  | -0.909257 | -3.322227 | -3.957458 |
| H                     | 2.595858  | 3.487547  | -0.757327 | C  | 0.233043  | -3.298036 | -1.021965 |
| H                     | 0.996956  | 3.286345  | -1.475507 | C  | 3.130931  | -1.921312 | -1.086452 |
| <b>4 Cp*</b>          |           |           |           | C  | 3.781897  | -1.178160 | -4.076109 |
| SCF (B3PW91) Energy = |           |           |           | C  | 0.722530  | 0.543976  | -0.265523 |
| Enthalpy 0K =         |           |           |           | O  | 1.152186  | 1.256728  | 0.676565  |
| Enthalpy 298K =       |           |           |           | H  | 5.379150  | 0.803413  | 3.245162  |
| Free Energy 298K =    |           |           |           | H  | 4.398610  | 0.530615  | 1.052460  |
| -1720.398934          |           |           |           | H  | 3.884466  | 2.499978  | 2.415397  |
| U                     | -0.076213 | 0.242210  | 2.781775  | H  | -0.352821 | -5.031577 | 4.038290  |
| C                     | 2.128913  | 0.790650  | 4.338560  | H  | -2.244325 | -3.669938 | 3.415254  |
| H                     | 2.581773  | 1.763071  | 4.528239  | H  | -0.599517 | -4.327110 | 1.736468  |
| C                     | 2.679731  | 0.109343  | 3.216189  | H  | -4.001019 | -0.577573 | -3.971458 |
| C                     | 2.348761  | -1.123977 | 2.605978  | H  | -4.161199 | 1.058847  | -2.166933 |
| C                     | 1.340265  | -2.114512 | 2.711386  | H  | -4.582415 | 1.712092  | -4.458178 |
| H                     | 1.422454  | -2.835223 | 1.900649  | Si | 2.478505  | 3.677319  | -2.061993 |
| C                     | 0.200899  | -2.341871 | 3.533215  | H  | 1.923062  | 4.091904  | -0.740467 |
| C                     | -0.252637 | -1.661157 | 4.701764  | H  | 3.735042  | 2.889104  | -1.864865 |
| C                     | 0.197583  | -0.554215 | 5.452556  | H  | 2.854003  | 4.915604  | -2.820251 |
| C                     | 1.164389  | 0.460239  | 5.311186  | H  | -1.305421 | -2.895912 | -4.883753 |
| H                     | 1.055586  | 1.235693  | 6.064466  | H  | -0.743422 | -4.392487 | -4.138449 |
| H                     | -0.458769 | -0.360352 | 6.298160  | H  | -1.692779 | -3.241850 | -3.198635 |
| H                     | -1.173564 | -2.071729 | 5.112203  | H  | -0.857378 | -3.230579 | -1.035864 |
| Si                    | -0.788237 | -3.902247 | 3.155058  | H  | 0.504011  | -4.361868 | -1.030789 |
| H                     | 2.966664  | -1.315844 | 1.732758  | H  | 0.562042  | -2.883213 | -0.068119 |

|   |           |           |           |    |          |           |           |
|---|-----------|-----------|-----------|----|----------|-----------|-----------|
| H | 2.623125  | -1.981083 | -0.123241 | U  | 3.450241 | -3.551759 | -1.310158 |
| H | 3.839913  | -2.758268 | -1.135927 | C  | 5.945355 | -3.587860 | -2.373859 |
| H | 3.716067  | -0.997415 | -1.092208 | H  | 6.152874 | -5.648017 | -2.373327 |
| H | 3.683958  | -0.630699 | -5.017388 | C  | 5.486719 | -2.252647 | -2.572995 |
| H | 4.268551  | -0.513819 | -3.356298 | C  | 4.324219 | -1.755176 | -3.219083 |
| H | 4.468506  | -2.015446 | -4.258252 | C  | 3.144680 | -2.308625 | -3.779103 |
| H | 0.360742  | -2.213254 | -6.297164 | H  | 4.273354 | -0.668449 | -3.206962 |
| H | 1.934722  | -1.406660 | -6.353016 | C  | 2.562647 | -3.588076 | -3.944212 |
| H | 1.843464  | -3.156609 | -6.173698 | C  | 3.044204 | -4.896783 | -3.657310 |
| H | -3.317811 | -0.337993 | 0.820107  | C  | 2.248211 | -1.553964 | -0.015167 |
| H | -3.814388 | -1.019865 | 2.368707  | C  | 4.285360 | -5.422437 | -3.238398 |
| H | -4.689403 | 0.355334  | 1.697522  | C  | 5.471108 | -4.872811 | -2.716424 |
| H | -1.341099 | 2.889448  | 0.126146  | H  | 2.313166 | -5.682129 | -3.844164 |
| H | -2.552382 | 1.627517  | -0.140537 | H  | 4.276456 | -6.507557 | -3.181967 |
| H | -3.037556 | 3.202222  | 0.495470  | Si | 0.823269 | -3.578770 | -4.680664 |
| H | -2.668586 | 0.000653  | 5.884910  | H  | 2.457647 | -1.514026 | -4.058966 |
| H | -4.209441 | 0.550908  | 5.229032  | Si | 6.766131 | -0.966156 | -2.056132 |
| H | -3.461609 | -0.918138 | 4.603396  | H  | 6.881871 | -3.644887 | -1.821458 |
| H | 0.071819  | 4.142641  | 3.579301  | C  | 4.838665 | -4.901917 | 0.723386  |
| H | -0.069072 | 3.963804  | 1.830386  | C  | 4.029643 | -3.947307 | 1.395602  |
| H | -1.320397 | 4.818754  | 2.734208  | C  | 2.661781 | -4.341097 | 1.229821  |
| H | -0.446348 | 3.161047  | 5.569354  | C  | 2.630535 | -5.540423 | 0.455931  |
| H | -2.180056 | 3.317329  | 5.848891  | C  | 3.972299 | -5.897961 | 0.155954  |
| H | -1.344744 | 1.839854  | 6.322979  | C  | 4.412771 | -7.212553 | -0.410694 |

#### 4-5-TS Cp\*

SCF (B3PW91) Energy = -1721.091347

Enthalpy 0K = -1720.300613

Enthalpy 298K = -1720.242246

Free Energy 298K = -1720.392270

Negative frequency = -635.2516 cm<sup>-1</sup>

|    |           |           |           |   |           |           |           |
|----|-----------|-----------|-----------|---|-----------|-----------|-----------|
| U  | 0.004440  | 0.443016  | 0.272943  | C | 1.404152  | -6.353821 | 0.158533  |
| C  | -0.792007 | -0.104164 | 2.847615  | C | 1.498101  | -3.813058 | 2.006328  |
| Si | 0.149688  | -0.239470 | 4.477331  | C | 4.526610  | -2.826122 | 2.260783  |
| C  | -0.986776 | -1.327393 | 2.160515  | C | 6.333967  | -4.988965 | 0.798324  |
| C  | -1.561499 | -1.754594 | 0.935327  | O | 2.140494  | -0.682360 | 0.912659  |
| C  | -2.200709 | -1.160772 | -0.181977 | H | 6.151026  | 0.387315  | -1.925272 |
| Si | -2.699204 | -2.352640 | -1.561442 | H | 7.401203  | -1.351484 | -0.755638 |
| C  | -2.616526 | 0.180896  | -0.429089 | H | 7.861307  | -0.880735 | -3.074824 |
| C  | -2.614223 | 1.366156  | 0.328692  | H | -0.024609 | -4.639829 | -4.056868 |
| C  | -2.067283 | 1.780617  | 1.565128  | H | 0.183021  | -2.239568 | -4.519992 |
| C  | -1.266341 | 1.212439  | 2.572736  | H | 0.890027  | -3.876921 | -6.150180 |
| H  | -0.930563 | 1.958351  | 3.291809  | H | -2.373723 | -1.779277 | -2.904100 |
| H  | -2.194414 | 2.848727  | 1.714562  | H | -2.031828 | -3.674160 | -1.386402 |
| H  | -3.046040 | 2.200870  | -0.218171 | H | -4.183473 | -2.565020 | -1.524887 |
| H  | -3.047042 | 0.331484  | -1.418220 | H | -0.798537 | -0.335705 | 5.633880  |
| H  | -1.359688 | -2.811156 | 0.773618  | H | 1.016597  | -1.456345 | 4.491868  |
| H  | -0.478829 | -2.155949 | 2.644667  | H | 0.995631  | 0.976072  | 4.696656  |
| C  | 2.140674  | 1.865946  | -0.767844 | H | 3.679658  | -7.627450 | -1.107167 |
| C  | 1.231896  | 1.738582  | -1.863794 | H | 5.370692  | -7.142654 | -0.931374 |
| C  | 0.091847  | 2.545541  | -1.588038 | H | 4.538605  | -7.942875 | 0.399384  |
| C  | 0.299970  | 3.183180  | -0.326758 | H | 1.545039  | -6.998033 | -0.714154 |
| C  | 1.552991  | 2.741384  | 0.193704  | H | 1.150431  | -7.004989 | 1.005350  |
| C  | 2.217790  | 3.249672  | 1.441014  | H | 0.534671  | -5.720792 | -0.039000 |
| C  | -0.513658 | 4.316369  | 0.217772  | H | 6.763545  | -5.477024 | -0.080595 |
| C  | -1.014153 | 2.846179  | -2.555647 | H | 6.797898  | -4.003189 | 0.890275  |
| C  | 1.501616  | 1.054956  | -3.169492 | H | 6.640026  | -5.573885 | 1.675536  |
| C  | 3.549883  | 1.365152  | -0.719782 | H | 3.850786  | -1.967891 | 2.251009  |
| C  | 1.074556  | -1.860601 | -0.804931 | H | 4.628969  | -3.160161 | 3.301666  |
| O  | 0.913451  | -2.981705 | -1.354581 | H | 5.510936  | -2.473457 | 1.938681  |
|    |           |           |           | H | 0.571121  | -3.865567 | 1.429651  |
|    |           |           |           | H | 1.353163  | -4.414603 | 2.913415  |
|    |           |           |           | H | 1.650944  | -2.779025 | 2.316294  |
|    |           |           |           | H | 3.884530  | 1.192682  | 0.305467  |
|    |           |           |           | H | 3.669189  | 0.419928  | -1.252526 |
|    |           |           |           | H | 4.226010  | 2.098530  | -1.177744 |
|    |           |           |           | H | 1.489651  | 3.523071  | 2.210541  |

|   |           |          |           |
|---|-----------|----------|-----------|
| H | 2.890349  | 2.504718 | 1.875459  |
| H | 2.818634  | 4.144238 | 1.230780  |
| H | 0.615514  | 0.550412 | -3.566567 |
| H | 1.834443  | 1.778640 | -3.925151 |
| H | 2.282708  | 0.302699 | -3.060567 |
| H | -1.957800 | 3.069388 | -2.050498 |
| H | -0.762695 | 3.719782 | -3.171436 |
| H | -1.194470 | 2.012862 | -3.240317 |
| H | -0.448036 | 4.389364 | 1.306571  |
| H | -0.143495 | 5.266301 | -0.190421 |
| H | -1.569307 | 4.241035 | -0.056247 |

### 6 Cp\*

SCF (B3PW91) Energy = -1721.137636  
Enthalpy 0K = -1720.346593  
Enthalpy 298K = -1720.286825  
Free Energy 298K = -1720.444481

|    |           |           |           |
|----|-----------|-----------|-----------|
| U  | 0.058319  | 0.238857  | 3.354805  |
| C  | 2.319373  | -0.885048 | 4.458334  |
| Si | 4.052096  | -0.183414 | 4.720644  |
| C  | 2.140838  | -1.578856 | 3.233594  |
| C  | 1.072342  | -2.160328 | 2.511251  |
| C  | -0.319074 | -2.373609 | 2.719940  |
| Si | -1.196220 | -3.238721 | 1.293689  |
| C  | -1.143071 | -2.188552 | 3.874531  |
| C  | -0.946651 | -1.658904 | 5.160627  |
| C  | 0.085482  | -0.953579 | 5.822163  |
| C  | 1.419178  | -0.586706 | 5.522732  |
| H  | 1.847514  | 0.047175  | 6.297808  |
| H  | -0.251357 | -0.530032 | 6.764655  |
| H  | -1.869040 | -1.648377 | 5.737381  |
| H  | -2.180576 | -2.474990 | 3.712458  |
| H  | 1.384519  | -2.397903 | 1.496701  |
| H  | 3.024690  | -1.521515 | 2.601471  |
| C  | -1.054425 | 2.724303  | 2.864447  |
| C  | -2.061908 | 1.786203  | 2.482149  |
| C  | -2.557506 | 1.162408  | 3.666210  |
| C  | -1.849991 | 1.712918  | 4.780621  |
| C  | -0.910382 | 2.664713  | 4.281568  |
| C  | -0.025180 | 3.549757  | 5.112126  |
| C  | -2.205689 | 1.516528  | 6.223429  |
| C  | -3.750395 | 0.256276  | 3.748427  |
| C  | -2.623233 | 1.615967  | 1.099505  |
| C  | -0.381703 | 3.709073  | 1.958650  |
| C  | 0.740261  | 0.729340  | -0.124391 |
| O  | 0.319796  | 0.383026  | -1.289360 |
| U  | 0.319601  | 0.185728  | -3.524688 |
| C  | -0.211217 | 2.116196  | -5.300258 |
| H  | 0.315745  | 1.024966  | -6.985762 |
| C  | -0.832836 | 2.564765  | -4.090700 |
| C  | -1.789641 | 1.941691  | -3.248593 |
| C  | -2.376209 | 0.659044  | -3.119746 |
| H  | -2.034304 | 2.550960  | -2.380745 |
| C  | -2.283971 | -0.600787 | -3.764734 |
| C  | -1.614685 | -1.001894 | -4.964476 |
| C  | 1.155256  | 1.042780  | 0.986443  |
| C  | -0.891694 | -0.320323 | -5.969975 |
| C  | -0.323310 | 0.962061  | -6.107882 |
| H  | -1.717496 | -2.062714 | -5.186542 |
| H  | -0.577886 | -0.988719 | -6.767408 |

|    |           |           |           |
|----|-----------|-----------|-----------|
| Si | -3.322480 | -1.969410 | -2.980168 |
| H  | -2.931730 | 0.600434  | -2.185958 |
| Si | -0.393709 | 4.339138  | -3.612673 |
| H  | 0.495970  | 2.831906  | -5.715033 |
| C  | 3.029893  | 0.155353  | -3.138620 |
| C  | 2.591561  | -1.154400 | -2.767315 |
| C  | 2.178798  | -1.836242 | -3.949928 |
| C  | 2.380769  | -0.956122 | -5.057434 |
| C  | 2.902432  | 0.276288  | -4.554572 |
| C  | 3.386198  | 1.424825  | -5.390965 |
| C  | 2.307012  | -1.349418 | -6.501692 |
| C  | 1.768119  | -3.278776 | -4.041261 |
| C  | 2.689241  | -1.755283 | -1.397371 |
| C  | 3.633740  | 1.172156  | -2.212465 |
| O  | 1.612374  | 1.439201  | 2.141430  |
| H  | -0.559399 | 4.538739  | -2.141954 |
| H  | 1.019403  | 4.638118  | -4.005467 |
| H  | -1.277026 | 5.317115  | -4.324002 |
| H  | -2.644272 | -3.293712 | -3.144547 |
| H  | -3.542780 | -1.691570 | -1.529584 |
| H  | -4.660189 | -2.064866 | -3.647383 |
| H  | -2.639966 | -2.845501 | 1.252193  |
| H  | -0.551946 | -2.895413 | -0.010753 |
| H  | -1.143633 | -4.728748 | 1.450067  |
| H  | 4.850886  | -1.063956 | 5.635158  |
| H  | 4.785688  | -0.081357 | 3.423543  |
| H  | 3.979044  | 1.165063  | 5.367670  |
| H  | 2.072085  | -0.503167 | -7.152622 |
| H  | 3.273484  | -1.751250 | -6.833443 |
| H  | 1.559301  | -2.126852 | -6.679840 |
| H  | 1.069105  | -3.456283 | -4.864208 |
| H  | 2.639893  | -3.923409 | -4.213009 |
| H  | 1.289032  | -3.629065 | -3.122372 |
| H  | 1.952648  | -2.550164 | -1.247541 |
| H  | 3.681040  | -2.201400 | -1.248491 |
| H  | 2.535051  | -1.011387 | -0.611499 |
| H  | 2.804113  | 1.533910  | -6.310723 |
| H  | 3.333547  | 2.375485  | -4.852838 |
| H  | 4.433432  | 1.277700  | -5.684986 |
| H  | 3.530217  | 2.190673  | -2.599692 |
| H  | 3.175741  | 1.147853  | -1.219446 |
| H  | 4.707884  | 0.988113  | -2.082129 |
| H  | -3.047389 | 0.618282  | 0.950156  |
| H  | -3.428742 | 2.339675  | 0.916851  |
| H  | -1.858193 | 1.764500  | 0.333020  |
| H  | 0.621358  | 3.962400  | 2.308929  |
| H  | -0.276975 | 3.316760  | 0.944429  |
| H  | -0.966487 | 4.636555  | 1.904399  |
| H  | 0.283163  | 3.063659  | 6.043116  |
| H  | 0.882666  | 3.835013  | 4.572786  |
| H  | -0.542021 | 4.477945  | 5.389254  |
| H  | -1.350743 | 1.677929  | 6.885794  |
| H  | -2.982053 | 2.233719  | 6.521254  |
| H  | -2.600152 | 0.516420  | 6.422293  |
| H  | -3.685502 | -0.431417 | 4.596154  |
| H  | -4.672079 | 0.839809  | 3.873808  |
| H  | -3.872052 | -0.346384 | 2.844049  |

### 7 Cp\*

SCF (B3PW91) Energy = -1721.140462



|                    |              |           |           |                       |              |           |           |
|--------------------|--------------|-----------|-----------|-----------------------|--------------|-----------|-----------|
| Enthalpy 0K =      | -1720.348634 | H         | -0.481322 | 2.621531              | -5.811555    |           |           |
| Enthalpy 298K =    | -1720.289036 | H         | -1.425731 | 4.407714              | -2.242217    |           |           |
| Free Energy 298K = | -1720.446873 | H         | -0.104063 | 4.628699              | -4.285154    |           |           |
| U                  | 0.112660     | 0.165720  | -3.437471 | H                     | -2.505803    | 4.853159  | -4.364429 |
| O                  | 0.360539     | 0.560159  | -1.280109 | H                     | -2.042414    | -3.737996 | -2.498180 |
| C                  | 0.719753     | 0.672346  | -0.045215 | H                     | -2.925146    | -2.201917 | -0.814487 |
| C                  | 1.058133     | 0.751844  | 1.121077  | H                     | -4.307954    | -2.923295 | -2.669262 |
| O                  | 1.398143     | 0.844544  | 2.362843  | H                     | -1.520185    | -1.628484 | 5.574904  |
| U                  | 1.678328     | 1.399865  | 4.484113  | H                     | -0.229191    | -2.810836 | 3.869007  |
| C                  | -0.978131    | 1.824397  | -5.261253 | H                     | -0.079224    | -3.461666 | 6.199136  |
| C                  | -0.961829    | 0.605336  | -5.973260 | H                     | 7.007607     | 0.303153  | 4.515817  |
| C                  | -1.266298    | -0.740767 | -5.681451 | H                     | 5.737773     | 0.357402  | 2.452198  |
| C                  | -1.725253    | -1.453083 | -4.551699 | H                     | 6.041650     | 2.387772  | 3.776079  |
| C                  | -2.294553    | -1.081234 | -3.291228 | H                     | 1.769239     | -0.030600 | -7.192705 |
| Si                 | -2.915073    | -2.542963 | -2.269016 | H                     | 3.042899     | -1.237534 | -7.038144 |
| C                  | -1.529519    | 2.252570  | -4.010471 | H                     | 1.356793     | -1.717371 | -6.862219 |
| Si                 | -1.383858    | 4.109603  | -3.706134 | H                     | 1.087911     | -3.271981 | -5.138799 |
| C                  | -2.238819    | 1.541902  | -3.008084 | H                     | 2.738226     | -3.642256 | -4.640318 |
| C                  | -2.549854    | 0.191212  | -2.717665 | H                     | 1.449128     | -3.588232 | -3.440860 |
| C                  | 3.978535     | 1.425706  | 5.882535  | H                     | 2.070456     | -2.621983 | -1.510406 |
| C                  | 3.025197     | 1.476310  | 6.922829  | H                     | 3.741137     | -2.064464 | -1.473233 |
| C                  | 1.798591     | 0.839891  | 7.205907  | H                     | 2.461755     | -1.079354 | -0.749635 |
| C                  | 0.997320     | -0.139707 | 6.577590  | H                     | 2.247634     | 2.013099  | -6.136665 |
| C                  | 1.205632     | -1.071018 | 5.510054  | H                     | 2.964547     | 2.699524  | -4.677618 |
| Si                 | -0.213563    | -2.293565 | 5.270396  | H                     | 3.955940     | 1.750531  | -5.782335 |
| C                  | 2.317733     | -1.280230 | 4.654575  | H                     | 3.243092     | 2.339089  | -2.497534 |
| C                  | 3.540649     | -0.629654 | 4.358784  | H                     | 2.981316     | 1.174607  | -1.196676 |
| C                  | 4.229398     | 0.534044  | 4.789725  | H                     | 4.498177     | 1.166603  | -2.106122 |
| Si                 | 5.816025     | 0.908773  | 3.839008  | H                     | -1.941288    | 1.893410  | 3.198949  |
| C                  | 2.839804     | 0.328746  | -3.183439 | H                     | -2.001480    | 3.500201  | 2.478479  |
| C                  | 2.520171     | -1.038879 | -2.912587 | H                     | -0.893583    | 2.279591  | 1.833796  |
| C                  | 2.109791     | -1.647431 | -4.135338 | H                     | 2.504170     | 4.196882  | 1.879236  |
| C                  | 2.181795     | -0.658610 | -5.164524 | H                     | 1.127040     | 3.297231  | 1.240246  |
| C                  | 2.625369     | 0.564916  | -4.573584 | H                     | 0.977458     | 5.025877  | 1.586574  |
| C                  | 3.412311     | 1.301342  | -2.194064 | H                     | 3.462770     | 4.776509  | 5.531087  |
| C                  | 2.701849     | -1.732157 | -1.593868 | H                     | 3.552286     | 4.816632  | 3.770180  |
| C                  | 1.825617     | -3.106721 | -4.347767 | H                     | 2.666242     | 6.070146  | 4.635409  |
| C                  | 2.071238     | -0.921478 | -6.635528 | H                     | 2.063474     | 4.354425  | 7.319492  |
| C                  | 2.959190     | 1.820249  | -5.327752 | H                     | 0.541158     | 5.236063  | 7.229622  |
| C                  | -0.269330    | 3.165422  | 3.706589  | H                     | 0.552313     | 3.562897  | 7.780701  |
| C                  | 0.964932     | 3.789315  | 3.341602  | H                     | -1.281666    | 2.411794  | 6.934252  |
| C                  | 1.630934     | 4.184720  | 4.539403  | H                     | -2.251072    | 3.610210  | 6.078181  |
| C                  | 0.803186     | 3.817992  | 5.645162  | H                     | -2.131808    | 1.967904  | 5.452792  |
| C                  | -0.368083    | 3.181903  | 5.129384  |                       |              |           |           |
| C                  | 1.417154     | 4.084714  | 1.941524  |                       |              |           |           |
| C                  | -1.324599    | 2.681407  | 2.755051  | <b>8 Cp*</b>          |              |           |           |
| C                  | -1.563143    | 2.766180  | 5.938297  | SCF (B3PW91) Energy = | -1607.795469 |           |           |
| C                  | 1.004922     | 4.254328  | 7.064730  | Enthalpy 0K =         | -1607.013687 |           |           |
| C                  | 2.892240     | 4.995954  | 4.623613  | Enthalpy 298K =       | -1606.956402 |           |           |
| H                  | 4.696633     | 2.240821  | 5.951565  | Free Energy 298K =    | -1607.107126 |           |           |
| H                  | 3.203576     | 2.315385  | 7.590423  | U                     | -0.382674    | -0.349465 | -0.208159 |
| H                  | 1.279074     | 1.316547  | 8.033690  | C                     | -2.345679    | 1.552680  | -0.172328 |
| H                  | 0.014601     | -0.218754 | 7.039019  | C                     | -1.748438    | 1.798940  | -1.451663 |
| H                  | 2.123741     | -2.052182 | 3.912361  | C                     | -1.473158    | 1.019094  | -2.582620 |
| H                  | 3.981198     | -1.062008 | 3.462547  | C                     | -1.524990    | -0.356299 | -2.913376 |
| H                  | -0.459901    | 0.705115  | -6.932498 | C                     | -1.893492    | -1.534475 | -2.246444 |
| H                  | -2.485106    | 2.169754  | -2.153999 | C                     | -2.547354    | -1.827544 | -1.006497 |
| H                  | -1.650562    | -2.529821 | -4.693087 | C                     | -3.032351    | -0.986289 | 0.033095  |
| H                  | -0.935730    | -1.408914 | -6.472782 | C                     | -2.947219    | 0.386527  | 0.379588  |
| H                  | -2.959486    | 0.114555  | -1.712298 | C                     | 2.038410     | 0.943691  | -0.564315 |
|                    |              |           |           | C                     | 1.871351     | 0.181757  | -1.758530 |

|    |           |           |           |
|----|-----------|-----------|-----------|
| C  | 2.258205  | 0.031682  | 0.511033  |
| C  | 2.204870  | -1.304974 | -0.024273 |
| C  | 1.949978  | -1.206389 | -1.422752 |
| C  | -0.006284 | -1.129900 | 1.971524  |
| O  | 0.200124  | -1.534362 | 3.127454  |
| H  | -3.490650 | -1.550597 | 0.843185  |
| H  | -3.346668 | 0.553048  | 1.378371  |
| Si | -2.557478 | 3.111669  | 0.857880  |
| H  | -2.701692 | 2.781972  | 2.310574  |
| H  | -1.406034 | 2.825976  | -1.573122 |
| H  | -0.991080 | 1.600605  | -3.365337 |
| H  | -1.065270 | -0.560768 | -3.878424 |
| H  | -1.633160 | -2.426140 | -2.815075 |
| H  | -4.284050 | -4.012753 | -1.327824 |
| Si | -2.936907 | -3.652442 | -0.772537 |
| H  | -2.946966 | -4.023161 | 0.677374  |
| H  | -1.927848 | -4.504021 | -1.480112 |
| C  | 1.949804  | -2.342041 | -2.404923 |
| C  | 2.602486  | -2.560719 | 0.690242  |
| C  | 2.757910  | 0.422837  | 1.868211  |
| C  | 1.845919  | 0.734971  | -3.150300 |
| C  | 2.134150  | 2.439957  | -0.478758 |
| H  | -3.777952 | 3.886768  | 0.455966  |
| H  | -1.383867 | 4.027691  | 0.686433  |
| U  | 0.350516  | -2.194785 | 5.371364  |
| C  | 2.801101  | -1.263796 | 6.099836  |
| C  | 2.086501  | -1.508838 | 7.314718  |
| C  | 1.443918  | -2.630615 | 7.881463  |
| C  | 1.049365  | -3.909545 | 7.434239  |
| C  | 1.126950  | -4.625078 | 6.219921  |
| C  | 1.837835  | -4.444221 | 4.991728  |
| C  | 2.694253  | -3.402996 | 4.551679  |
| C  | 3.079217  | -2.111217 | 4.994109  |
| C  | -1.644640 | -0.699777 | 6.555576  |
| C  | -1.826979 | -2.003572 | 7.112707  |
| C  | -1.966451 | -0.768105 | 5.167196  |
| C  | -2.328381 | -2.123367 | 4.862060  |
| C  | -2.236302 | -2.885112 | 6.064308  |
| H  | 3.058225  | -3.572220 | 3.540955  |
| H  | 3.650742  | -1.604793 | 4.218898  |
| Si | 3.661595  | 0.418442  | 6.071040  |
| H  | 3.992430  | 0.818058  | 4.671838  |
| H  | 2.032063  | -0.639749 | 7.968341  |
| H  | 1.027912  | -2.404100 | 8.859542  |
| H  | 0.411124  | -4.410235 | 8.158214  |
| H  | 0.528736  | -5.534201 | 6.246570  |
| H  | 2.633486  | -6.996501 | 4.176184  |
| Si | 1.677132  | -5.906268 | 3.803373  |
| H  | 1.973065  | -5.475103 | 2.405317  |
| H  | 0.294162  | -6.473525 | 3.875886  |
| C  | -2.653437 | -4.315833 | 6.245614  |
| C  | -2.866373 | -2.605445 | 3.549942  |
| C  | -2.087800 | 0.398570  | 4.237389  |
| C  | -1.851915 | -2.326467 | 8.575513  |
| C  | -1.344623 | 0.549985  | 7.333309  |
| H  | 4.932967  | 0.366482  | 6.859895  |
| H  | 2.783921  | 1.455600  | 6.698490  |
| H  | 2.048979  | -3.429305 | 0.323693  |
| H  | 3.672863  | -2.766238 | 0.548504  |
| H  | 2.412489  | -2.489230 | 1.762209  |

|   |           |           |           |
|---|-----------|-----------|-----------|
| H | 2.518429  | -0.326024 | 2.624777  |
| H | 3.849871  | 0.546367  | 1.853811  |
| H | 2.327356  | 1.370739  | 2.202346  |
| H | 1.781340  | 2.817567  | 0.485703  |
| H | 3.171576  | 2.779823  | -0.598133 |
| H | 1.540090  | 2.930127  | -1.255315 |
| H | 1.246670  | 0.122644  | -3.828667 |
| H | 1.450794  | 1.752979  | -3.179796 |
| H | 2.866362  | 0.768671  | -3.554854 |
| H | 1.650480  | -3.284376 | -1.937202 |
| H | 1.266488  | -2.160058 | -3.240086 |
| H | 2.950251  | -2.496580 | -2.830835 |
| H | -2.897922 | -3.696902 | 3.498957  |
| H | -3.892754 | -2.246049 | 3.400713  |
| H | -2.272916 | -2.254020 | 2.700606  |
| H | -2.526408 | -4.899884 | 5.329976  |
| H | -2.077320 | -4.811302 | 7.032747  |
| H | -3.712047 | -4.381391 | 6.527620  |
| H | -1.565351 | -3.361228 | 8.780167  |
| H | -1.195300 | -1.673223 | 9.155511  |
| H | -2.868066 | -2.190905 | 8.968242  |
| H | -0.806851 | 1.289791  | 6.733475  |
| H | -2.270627 | 1.027377  | 7.678624  |
| H | -0.737519 | 0.344041  | 8.219551  |
| H | -1.595479 | 0.232158  | 3.271694  |
| H | -3.144535 | 0.608224  | 4.030079  |
| H | -1.662128 | 1.306738  | 4.671873  |

#### 8-9-TS Cp\*

|                       |                            |           |           |
|-----------------------|----------------------------|-----------|-----------|
| SCF (B3PW91) Energy = | -1607.783398               |           |           |
| Enthalpy 0K =         | -1607.001841               |           |           |
| Enthalpy 298K =       | -1606.945228               |           |           |
| Free Energy 298K =    | -1607.093103               |           |           |
| Negative frequency =  | -115.5730 cm <sup>-1</sup> |           |           |
| U                     | 0.091010                   | -0.120924 | 0.160826  |
| U                     | -0.071312                  | 0.076511  | 5.694708  |
| C                     | 2.543585                   | -1.342811 | -0.192250 |
| C                     | 2.866165                   | -0.068304 | 0.341555  |
| C                     | 2.467079                   | 1.278974  | 0.165880  |
| C                     | 1.592118                   | 1.992348  | -0.700652 |
| C                     | 0.879290                   | 1.569052  | -1.863124 |
| C                     | 0.685197                   | 0.342177  | -2.518979 |
| C                     | 0.960836                   | -1.017759 | -2.241325 |
| C                     | 1.695763                   | -1.731619 | -1.264154 |
| Si                    | 3.366803                   | -2.799547 | 0.691803  |
| Si                    | 1.543968                   | 3.865675  | -0.452268 |
| C                     | -2.346638                  | -1.103007 | 0.929212  |
| C                     | -2.513506                  | 0.320293  | 0.901629  |
| C                     | -2.485058                  | 0.735345  | -0.463640 |
| C                     | -2.309816                  | -0.427239 | -1.274631 |
| C                     | -2.201758                  | -1.560805 | -0.411790 |
| H                     | 2.436777                   | -3.970322 | 0.726057  |
| H                     | 4.597499                   | -3.225850 | -0.049753 |
| H                     | 3.766054                   | -2.416690 | 2.077528  |
| H                     | 2.105622                   | 4.229840  | 0.881263  |
| H                     | 0.142780                   | 4.381420  | -0.562341 |
| H                     | 2.353214                   | 4.545137  | -1.512867 |
| H                     | 3.495268                   | -0.151482 | 1.224696  |
| H                     | 2.891102                   | 1.910898  | 0.943054  |
| H                     | 0.319228                   | 2.371255  | -2.342036 |

|    |           |           |           |
|----|-----------|-----------|-----------|
| H  | 0.015202  | 0.442373  | -3.367883 |
| H  | 0.434644  | -1.684428 | -2.920510 |
| H  | 1.585016  | -2.808624 | -1.377713 |
| C  | -2.492310 | -1.977452 | 2.132064  |
| C  | -2.896932 | 1.189681  | 2.063687  |
| C  | -2.784274 | 2.117891  | -0.966579 |
| C  | -2.490984 | -0.491333 | -2.760048 |
| C  | -2.143611 | -2.994431 | -0.854814 |
| C  | 1.139251  | 2.388358  | 4.812752  |
| C  | 2.210742  | 1.439833  | 4.953428  |
| C  | 2.394267  | 1.190333  | 6.344132  |
| C  | 1.455491  | 1.988703  | 7.062244  |
| C  | 0.666615  | 2.714573  | 6.116678  |
| C  | -0.342306 | -2.589654 | 6.243887  |
| C  | 0.374323  | -2.032552 | 7.346659  |
| C  | 0.082182  | -1.049552 | 8.317135  |
| C  | -0.939171 | -0.092819 | 8.512009  |
| C  | -2.055930 | 0.361462  | 7.799123  |
| C  | -2.700596 | -0.031382 | 6.587023  |
| C  | -2.518741 | -1.169229 | 5.748221  |
| C  | -1.571213 | -2.218115 | 5.633170  |
| Si | 0.493520  | -4.092667 | 5.479876  |
| Si | -4.246467 | 0.977525  | 6.217048  |
| H  | 1.342453  | -2.501234 | 7.518678  |
| H  | 0.880050  | -0.952471 | 9.050429  |
| H  | -0.736119 | 0.529495  | 9.380476  |
| H  | -2.483360 | 1.259151  | 8.245112  |
| H  | -3.239368 | -1.209472 | 4.933819  |
| H  | -1.796612 | -2.833679 | 4.764963  |
| H  | 1.984404  | -3.953011 | 5.517528  |
| H  | 0.155291  | -5.346765 | 6.231806  |
| H  | 0.048807  | -4.289974 | 4.064696  |
| H  | -4.016449 | 2.434830  | 6.479444  |
| H  | -5.398954 | 0.555048  | 7.078597  |
| H  | -4.665452 | 0.805388  | 4.790752  |
| C  | 3.143654  | 0.995642  | 3.870577  |
| C  | 3.483103  | 0.357988  | 6.956135  |
| C  | 1.456322  | 2.213641  | 8.542787  |
| C  | -0.345602 | 3.773757  | 6.446124  |
| C  | 0.757477  | 3.125807  | 3.563667  |
| C  | 0.266828  | -0.400422 | 3.374210  |
| O  | 0.546868  | -1.040634 | 2.340573  |
| H  | -0.320493 | 3.298976  | 3.497081  |
| H  | 1.249145  | 4.108089  | 3.533586  |
| H  | 1.053730  | 2.579219  | 2.666575  |
| H  | 3.586710  | 0.020495  | 4.088749  |
| H  | 2.629014  | 0.910448  | 2.913011  |
| H  | 3.967230  | 1.712727  | 3.746560  |
| H  | 3.169656  | -0.083611 | 7.906600  |
| H  | 3.788022  | -0.462133 | 6.299457  |
| H  | 4.377854  | 0.962000  | 7.156975  |
| H  | 0.481902  | 2.546452  | 8.907711  |
| H  | 1.737024  | 1.316295  | 9.100034  |
| H  | 2.184268  | 2.995471  | 8.797874  |
| H  | -0.902106 | 3.540644  | 7.358592  |
| H  | 0.138347  | 4.747534  | 6.600180  |
| H  | -1.076436 | 3.903522  | 5.642492  |
| H  | -2.297102 | 2.322980  | -1.923979 |
| H  | -3.863622 | 2.250177  | -1.116654 |
| H  | -2.461913 | 2.890345  | -0.262861 |

|   |           |           |           |
|---|-----------|-----------|-----------|
| H | -1.864775 | -1.256081 | -3.228190 |
| H | -3.533270 | -0.746533 | -2.992025 |
| H | -2.280256 | 0.464856  | -3.244729 |
| H | -1.590972 | -3.111577 | -1.791720 |
| H | -1.666767 | -3.635572 | -0.108199 |
| H | -3.153004 | -3.392044 | -1.022492 |
| H | -1.907606 | -2.898045 | 2.050748  |
| H | -2.166599 | -1.459132 | 3.034412  |
| H | -3.542712 | -2.264700 | 2.270703  |
| H | -2.582824 | 2.227706  | 1.918213  |
| H | -3.987745 | 1.195884  | 2.189868  |
| H | -2.442902 | 0.839657  | 2.993672  |

### 10 Cp\*

|                       |           |              |           |
|-----------------------|-----------|--------------|-----------|
| SCF (B3PW91) Energy = |           | -1721.105584 |           |
| Enthalpy 0K =         |           | -1720.312935 |           |
| Enthalpy 298K =       |           | -1720.254249 |           |
| Free Energy 298K =    |           | -1720.403656 |           |
| U                     | 8.070090  | 9.321015     | 3.480272  |
| U                     | 10.749567 | 5.979725     | 1.238776  |
| C                     | 9.639931  | 11.044820    | 1.694227  |
| C                     | 10.450346 | 10.854963    | 2.842236  |
| C                     | 10.287747 | 10.764313    | 4.236849  |
| C                     | 9.228033  | 11.039915    | 5.155467  |
| C                     | 7.950250  | 11.626998    | 4.924312  |
| C                     | 7.160154  | 11.929048    | 3.796817  |
| C                     | 7.226764  | 11.695462    | 2.409470  |
| C                     | 8.256157  | 11.286531    | 1.528435  |
| Si                    | 10.575070 | 10.794557    | 0.076382  |
| Si                    | 9.733632  | 10.918206    | 6.969655  |
| C                     | 5.703774  | 7.836472     | 3.203933  |
| C                     | 6.408009  | 7.206315     | 4.271305  |
| C                     | 6.429090  | 8.105828     | 5.379794  |
| C                     | 5.675651  | 9.264028     | 5.017423  |
| C                     | 5.257246  | 9.113658     | 3.662527  |
| H                     | 9.823609  | 11.428390    | -1.050158 |
| H                     | 11.925554 | 11.431223    | 0.181954  |
| H                     | 10.797190 | 9.355127     | -0.281510 |
| H                     | 10.667390 | 9.772712     | 7.182746  |
| H                     | 8.522318  | 10.748940    | 7.831616  |
| H                     | 10.427300 | 12.173128    | 7.404253  |
| H                     | 11.460776 | 10.548491    | 2.573809  |
| H                     | 11.185016 | 10.388084    | 4.723376  |
| H                     | 7.394311  | 11.797400    | 5.843187  |
| H                     | 6.170739  | 12.269139    | 4.091753  |
| H                     | 6.283707  | 11.879415    | 1.902229  |
| H                     | 7.913460  | 11.236017    | 0.497511  |
| C                     | 5.236477  | 7.186760     | 1.933716  |
| C                     | 6.816082  | 5.767892     | 4.337922  |
| C                     | 6.924339  | 7.779989     | 6.760818  |
| C                     | 5.157286  | 10.283520    | 5.984549  |
| C                     | 4.280894  | 9.990319     | 2.936524  |
| C                     | 13.296316 | 7.102966     | 1.543361  |
| C                     | 13.557073 | 5.857769     | 0.907122  |
| C                     | 13.253966 | 4.815110     | 1.840423  |
| C                     | 12.809439 | 5.419194     | 3.051352  |
| C                     | 12.849180 | 6.836345     | 2.871674  |
| C                     | 8.922032  | 6.549807     | -0.829101 |
| C                     | 10.199656 | 6.357449     | -1.420811 |
| C                     | 11.116758 | 5.285541     | -1.425542 |

|    |           |           |           |
|----|-----------|-----------|-----------|
| C  | 11.211602 | 4.044990  | -0.757642 |
| C  | 10.546895 | 3.393845  | 0.294357  |
| C  | 9.379517  | 3.651904  | 1.073003  |
| C  | 8.368259  | 4.639864  | 0.917257  |
| C  | 8.190759  | 5.794457  | 0.124362  |
| Si | 7.965810  | 8.035960  | -1.476133 |
| Si | 9.003335  | 2.320148  | 2.356253  |
| H  | 10.524573 | 7.183270  | -2.050202 |
| H  | 11.986721 | 5.487906  | -2.044158 |
| H  | 12.131574 | 3.527669  | -1.020860 |
| H  | 11.099987 | 2.519390  | 0.630652  |
| H  | 7.567033  | 4.540156  | 1.645090  |
| H  | 7.276359  | 6.303491  | 0.420183  |
| H  | 8.841709  | 8.909705  | -2.312562 |
| H  | 6.814092  | 7.583035  | -2.321474 |
| H  | 7.379000  | 8.855495  | -0.365530 |
| H  | 10.275379 | 1.799104  | 2.949703  |
| H  | 8.291818  | 1.158861  | 1.731564  |
| H  | 8.138109  | 2.866616  | 3.443546  |
| C  | 14.284157 | 5.689602  | -0.392432 |
| C  | 13.611234 | 3.367874  | 1.685313  |
| C  | 12.559468 | 4.679116  | 4.334975  |
| C  | 12.714333 | 7.878637  | 3.939363  |
| C  | 13.656285 | 8.455226  | 1.002616  |
| O  | 10.002137 | 6.569925  | 5.673957  |
| C  | 9.914390  | 6.948952  | 4.541617  |
| C  | 9.516554  | 7.086755  | 3.300758  |
| O  | 9.794283  | 7.949856  | 2.249725  |
| H  | 12.939863 | 2.712979  | 2.247024  |
| H  | 13.597363 | 3.046520  | 0.641171  |
| H  | 14.626341 | 3.188670  | 2.063989  |
| H  | 12.087130 | 3.707308  | 4.159287  |
| H  | 13.507775 | 4.482992  | 4.852708  |
| H  | 11.918207 | 5.232756  | 5.023193  |
| H  | 12.480257 | 7.436879  | 4.909228  |
| H  | 13.658272 | 8.427657  | 4.046203  |
| H  | 11.933022 | 8.606100  | 3.704402  |
| H  | 13.075885 | 9.247866  | 1.480029  |
| H  | 14.716583 | 8.675710  | 1.185506  |
| H  | 13.492820 | 8.533823  | -0.076331 |
| H  | 14.050610 | 4.740147  | -0.880881 |
| H  | 14.058938 | 6.494338  | -1.098007 |
| H  | 15.368724 | 5.704984  | -0.221513 |
| H  | 7.570262  | 5.598034  | 5.108625  |
| H  | 5.944395  | 5.146196  | 4.582813  |
| H  | 7.238088  | 5.413347  | 3.398291  |
| H  | 7.166479  | 8.682858  | 7.328048  |
| H  | 6.157161  | 7.237378  | 7.328978  |
| H  | 7.822376  | 7.157811  | 6.740323  |
| H  | 4.150712  | 7.029076  | 1.964947  |
| H  | 5.441599  | 7.785637  | 1.039388  |
| H  | 5.694260  | 6.204897  | 1.796406  |
| H  | 4.339585  | 11.032961 | 3.260597  |
| H  | 4.432737  | 9.968779  | 1.853287  |
| H  | 3.252101  | 9.653742  | 3.123275  |
| H  | 4.969988  | 11.254690 | 5.519451  |
| H  | 4.200499  | 9.939828  | 6.399864  |
| H  | 5.833907  | 10.434181 | 6.829153  |

11-12-TS Cp\*

|                       |                           |           |           |
|-----------------------|---------------------------|-----------|-----------|
| SCF (B3PW91) Energy = | -1834.425780              |           |           |
| Enthalpy 0K =         | -1833.624570              |           |           |
| Enthalpy 298K =       | -1833.564380              |           |           |
| Free Energy 298K =    | -1833.722009              |           |           |
| Negative frequency =  | -90.6932 cm <sup>-1</sup> |           |           |
| U                     | 8.018902                  | 10.046843 | 4.447073  |
| U                     | 11.236199                 | 4.934685  | 0.784785  |
| C                     | 9.263177                  | 12.119482 | 3.262665  |
| C                     | 10.307485                 | 11.500869 | 4.003995  |
| C                     | 10.480415                 | 10.999073 | 5.316165  |
| C                     | 9.691908                  | 10.823119 | 6.481823  |
| C                     | 8.371386                  | 11.259960 | 6.808545  |
| C                     | 7.426473                  | 12.106637 | 6.178968  |
| C                     | 7.291886                  | 12.689704 | 4.903142  |
| C                     | 7.991187                  | 12.626493 | 3.678845  |
| Si                    | 9.688426                  | 12.499005 | 1.461929  |
| Si                    | 10.538939                 | 9.871052  | 7.876693  |
| C                     | 6.131741                  | 8.966872  | 2.767272  |
| C                     | 6.300756                  | 7.995271  | 3.799470  |
| C                     | 5.770491                  | 8.533038  | 5.009111  |
| C                     | 5.234253                  | 9.825348  | 4.717459  |
| C                     | 5.459390                  | 10.094470 | 3.332221  |
| H                     | 8.449378                  | 12.461028 | 0.623126  |
| H                     | 10.284079                 | 13.866531 | 1.330979  |
| H                     | 10.675345                 | 11.506614 | 0.939127  |
| H                     | 11.645617                 | 9.026717  | 7.334789  |
| H                     | 9.545427                  | 9.003730  | 8.585601  |
| H                     | 11.117067                 | 10.809677 | 8.890807  |
| H                     | 11.155457                 | 11.225570 | 3.379793  |
| H                     | 11.426619                 | 10.465254 | 5.381785  |
| H                     | 8.022734                  | 10.916170 | 7.780985  |
| H                     | 6.537667                  | 12.248508 | 6.787830  |
| H                     | 6.325086                  | 13.173923 | 4.785808  |
| H                     | 7.415544                  | 13.065907 | 2.866643  |
| C                     | 6.481105                  | 8.776665  | 1.317639  |
| C                     | 6.808467                  | 6.599128  | 3.612609  |
| C                     | 5.655414                  | 7.801654  | 6.316690  |
| C                     | 4.385686                  | 10.643371 | 5.643828  |
| C                     | 4.907378                  | 11.258728 | 2.563939  |
| C                     | 12.513597                 | 6.937956  | -0.632045 |
| C                     | 13.055566                 | 5.734469  | -1.164921 |
| C                     | 13.874183                 | 5.133920  | -0.151664 |
| C                     | 13.828145                 | 5.965826  | 1.003867  |
| C                     | 12.995962                 | 7.085694  | 0.704205  |
| C                     | 9.249197                  | 3.776245  | -0.651744 |
| C                     | 10.438301                 | 3.192363  | -1.191625 |
| C                     | 11.556739                 | 2.535754  | -0.648371 |
| C                     | 12.062186                 | 2.267627  | 0.644838  |
| C                     | 11.625353                 | 2.504470  | 1.963666  |
| C                     | 10.403192                 | 2.965525  | 2.543072  |
| C                     | 9.208159                  | 3.465788  | 1.963259  |
| C                     | 8.736211                  | 3.807692  | 0.673370  |
| Si                    | 8.079892                  | 4.476768  | -1.954779 |
| Si                    | 10.329612                 | 2.791420  | 4.418618  |
| H                     | 10.531932                 | 3.323518  | -2.268038 |
| H                     | 12.282696                 | 2.281855  | -1.418175 |
| H                     | 13.076096                 | 1.877883  | 0.613012  |
| H                     | 12.382528                 | 2.240063  | 2.699676  |
| H                     | 8.497195                  | 3.800249  | 2.717672  |
| H                     | 7.795253                  | 4.349677  | 0.745014  |

|   |           |           |           |    |           |           |           |
|---|-----------|-----------|-----------|----|-----------|-----------|-----------|
| H | 8.855688  | 5.063140  | -3.094408 | C  | 6.669357  | 12.310994 | 5.427811  |
| H | 7.194889  | 3.409099  | -2.524019 | C  | 6.817170  | 12.418913 | 4.026827  |
| H | 7.202196  | 5.532481  | -1.363068 | C  | 7.832446  | 12.085695 | 3.102225  |
| H | 11.702835 | 2.843932  | 5.007562  | Si | 10.042631 | 11.402337 | 1.559043  |
| H | 9.721823  | 1.475338  | 4.803342  | Si | 9.140286  | 10.713304 | 8.416284  |
| H | 9.477479  | 3.863688  | 5.021744  | C  | 5.136485  | 8.607133  | 3.690183  |
| C | 12.968093 | 5.283858  | -2.593207 | C  | 5.803238  | 7.641818  | 4.506027  |
| C | 14.810616 | 3.981541  | -0.359627 | C  | 5.715876  | 8.068091  | 5.867916  |
| C | 14.625366 | 5.776343  | 2.262906  | C  | 5.021614  | 9.307232  | 5.891123  |
| C | 12.853709 | 8.326644  | 1.532141  | C  | 4.664793  | 9.642970  | 4.539361  |
| C | 11.676711 | 7.946375  | -1.363855 | H  | 9.072874  | 11.396518 | 0.422081  |
| O | 9.306668  | 8.282780  | 4.042128  | H  | 10.985112 | 12.551074 | 1.340771  |
| C | 10.090116 | 7.316723  | 3.587225  | H  | 10.878837 | 10.159695 | 1.516711  |
| C | 10.340124 | 6.664709  | 2.383956  | H  | 10.130545 | 9.595033  | 8.439210  |
| O | 9.825770  | 6.828158  | 1.214468  | H  | 7.908651  | 10.304410 | 9.165634  |
| C | 11.078671 | 6.635755  | 4.261130  | H  | 9.738387  | 11.871280 | 9.158450  |
| O | 11.879811 | 6.154800  | 4.967631  | H  | 10.867403 | 10.677560 | 4.005167  |
| H | 14.097367 | 6.150359  | 3.144589  | H  | 10.583120 | 10.411513 | 6.137850  |
| H | 14.855054 | 4.722447  | 2.445223  | H  | 6.845904  | 11.797351 | 7.426521  |
| H | 15.583163 | 6.310074  | 2.206280  | H  | 5.673639  | 12.609227 | 5.747809  |
| H | 15.031114 | 3.456990  | 0.573882  | H  | 5.909373  | 12.767529 | 3.541351  |
| H | 14.415920 | 3.249027  | -1.068752 | H  | 7.508103  | 12.241624 | 2.075392  |
| H | 15.767520 | 4.338870  | -0.762716 | C  | 4.883329  | 8.475374  | 2.217747  |
| H | 13.024831 | 4.195822  | -2.683842 | C  | 6.270553  | 6.292679  | 4.048913  |
| H | 12.039238 | 5.607133  | -3.071123 | C  | 6.174948  | 7.274330  | 7.055246  |
| H | 13.796654 | 5.701903  | -3.179803 | C  | 4.531310  | 10.015533 | 7.118224  |
| H | 10.909734 | 8.378260  | -0.714168 | C  | 3.748278  | 10.758194 | 4.133655  |
| H | 12.295469 | 8.771327  | -1.740404 | C  | 13.785567 | 6.280137  | 2.062529  |
| H | 11.168267 | 7.506009  | -2.226513 | C  | 14.147344 | 6.038233  | 0.704521  |
| H | 13.046056 | 8.137780  | 2.590803  | C  | 14.304419 | 4.627615  | 0.537559  |
| H | 13.574879 | 9.084171  | 1.197290  | C  | 14.026584 | 3.997192  | 1.791698  |
| H | 11.856003 | 8.765497  | 1.444608  | C  | 13.708885 | 5.019280  | 2.734591  |
| H | 7.361948  | 6.239683  | 4.484254  | C  | 10.036294 | 6.021269  | -0.972595 |
| H | 5.967763  | 5.911997  | 3.450535  | C  | 11.106085 | 5.305183  | -1.598559 |
| H | 7.470510  | 6.523515  | 2.747596  | C  | 11.604867 | 3.983105  | -1.529138 |
| H | 6.622844  | 9.733100  | 0.804912  | C  | 11.422531 | 2.877703  | -0.674788 |
| H | 7.395449  | 8.189846  | 1.185135  | C  | 10.639054 | 2.606536  | 0.473178  |
| H | 5.677127  | 8.247870  | 0.789519  | C  | 9.536760  | 3.257093  | 1.112722  |
| H | 4.806853  | 12.152024 | 3.186487  | C  | 8.890696  | 4.492711  | 0.847590  |
| H | 5.531989  | 11.522377 | 1.705647  | C  | 9.095093  | 5.620213  | 0.013099  |
| H | 3.908755  | 11.022405 | 2.174147  | Si | 9.748050  | 7.752645  | -1.685889 |
| H | 5.636974  | 8.485886  | 7.170464  | Si | 8.755198  | 2.245641  | 2.506841  |
| H | 4.731414  | 7.210385  | 6.357658  | H  | 11.663332 | 5.906217  | -2.315075 |
| H | 6.486134  | 7.105891  | 6.469770  | H  | 12.443083 | 3.834035  | -2.204499 |
| H | 4.424074  | 11.709964 | 5.406615  | H  | 12.156430 | 2.095972  | -0.858072 |
| H | 3.334878  | 10.334070 | 5.570399  | H  | 10.923953 | 1.668648  | 0.945836  |
| H | 4.682620  | 10.522796 | 6.689476  | H  | 8.114911  | 4.712447  | 1.578711  |
|   |           |           |           | H  | 8.430707  | 6.431158  | 0.305925  |
|   |           |           |           | H  | 11.063378 | 8.380622  | -2.027411 |
|   |           |           |           | H  | 8.955756  | 7.654158  | -2.952689 |
|   |           |           |           | H  | 9.007485  | 8.594762  | -0.707085 |
|   |           |           |           | H  | 9.797910  | 1.397917  | 3.165633  |
|   |           |           |           | H  | 7.699588  | 1.330894  | 1.968134  |
|   |           |           |           | H  | 8.124263  | 3.145187  | 3.518088  |
|   |           |           |           | C  | 14.481094 | 7.087317  | -0.317599 |
|   |           |           |           | C  | 14.894318 | 3.951267  | -0.662800 |
|   |           |           |           | C  | 14.206953 | 2.535631  | 2.086115  |
|   |           |           |           | C  | 13.442149 | 4.836598  | 4.200294  |
|   |           |           |           | C  | 13.643521 | 7.623820  | 2.712580  |
|   |           |           |           | O  | 8.066791  | 8.747752  | 2.344779  |

**12 Cp\***  
SCF (B3PW91) Energy = -1834.459589  
Enthalpy 0K = -1833.656374  
Enthalpy 298K = -1833.596016  
Free Energy 298K = -1833.754219

|   |           |           |          |
|---|-----------|-----------|----------|
| U | 7.470066  | 9.831383  | 4.623380 |
| U | 11.576532 | 5.043404  | 1.015672 |
| C | 9.151600  | 11.575809 | 3.209212 |
| C | 9.918518  | 11.115546 | 4.314503 |
| C | 9.747931  | 10.959678 | 5.707758 |
| C | 8.706380  | 11.195597 | 6.645593 |
| C | 7.423454  | 11.794621 | 6.504506 |



|   |           |          |           |   |           |           |          |
|---|-----------|----------|-----------|---|-----------|-----------|----------|
| C | 8.866186  | 7.993587 | 2.989831  | H | 13.919446 | 1.908182  | 1.236905 |
| C | 9.895197  | 7.068297 | 3.232175  | H | 15.256964 | 2.311199  | 2.313614 |
| O | 10.811545 | 6.268560 | 2.794237  | H | 7.082705  | 5.908705  | 4.672064 |
| C | 9.231585  | 7.655209 | 4.321608  | H | 5.448129  | 5.566977  | 4.102141 |
| O | 8.934975  | 7.942949 | 5.526613  | H | 6.614374  | 6.316269  | 3.011070 |
| H | 13.178124 | 3.802927 | 4.441059  | H | 4.590148  | 9.429195  | 1.770481 |
| H | 14.332443 | 5.087491 | 4.790265  | H | 5.772501  | 8.124768  | 1.687011 |
| H | 12.625544 | 5.477880 | 4.544170  | H | 4.069892  | 7.763544  | 2.026122 |
| H | 12.964394 | 7.583358 | 3.566450  | H | 3.852641  | 11.634456 | 4.778797 |
| H | 14.616432 | 7.981288 | 3.073105  | H | 3.924131  | 11.081962 | 3.104221 |
| H | 13.257610 | 8.379463 | 2.021793  | H | 2.700871  | 10.435087 | 4.197485 |
| H | 14.266270 | 6.754694 | -1.337244 | H | 4.410814  | 11.089433 | 6.952920 |
| H | 13.926739 | 8.015049 | -0.150388 | H | 3.550179  | 9.624363  | 7.418088 |
| H | 15.548323 | 7.340587 | -0.278425 | H | 5.206235  | 9.884337  | 7.968057 |
| H | 14.500582 | 2.941233 | -0.807587 | H | 6.224400  | 7.888344  | 7.958401 |
| H | 14.715530 | 4.516844 | -1.580966 | H | 5.481014  | 6.449005  | 7.261102 |
| H | 15.982364 | 3.859355 | -0.548369 | H | 7.168258  | 6.846794  | 6.892412 |
| H | 13.615703 | 2.213795 | 2.947861  |   |           |           |          |

## ESI References

1. M. J. Frisch, G. W. Trucks, H. B. Schlegel, G. E. Scuseria, M. A. Robb, J. R. Cheeseman, J. A. Montgomery, Jr., T. Vreven, K. N. Kudin, J. C. Burant, J. M. Millam, S. S. Iyengar, J. Tomasi, V. Barone, B. Mennucci, M. Cossi, G. Scalmani, N. Rega, G. A. Petersson, H. Nakatsuji, M. Hada, M. Ehara, K. Toyota, R. Fukuda, J. Hasegawa, M. Ishida, T. Nakajima, Y. Honda, O. Kitao, H. Nakai, M. Klene, X. Li, J. E. Knox, H. P. Hratchian, J. B. Cross, V. Bakken, C. Adamo, J. Jaramillo, R. Gomperts, R. E. Stratmann, O. Yazyev, A. J. Austin, R. Cammi, C. Pomelli, J. W. Ochterski, P. Y. Ayala, K. Morokuma, G. A. Voth, P. Salvador, J. J. Dannenberg, V. G. Zakrzewski, S. Dapprich, A. D. Daniels, M. C. Strain, O. Farkas, D. K. Malick, A. D. Rabuck, K. Raghavachari, J. B. Foresman, J. V. Ortiz, Q. Cui, A. G. Baboul, S. Clifford, J. Cioslowski, B. B. Stefanov, G. Liu, A. Liashenko, P. Piskorz, I. Komaromi, R. L. Martin, D. J. Fox, T. Keith, M. A. Al-Laham, C. Y. Peng, A. Nanayakkara, M. Challacombe, P. M. W. Gill, B. Johnson, W. Chen, M. W. Wong, C. Gonzalez and J. A. Pople, Gaussian Inc., Wallingford, CT, USA, 2004.
2. (a) J. P. Perdew and Y. Wang, *Phys. Rev. B*, 1992, **45**, 13244; (b) A. D. Becke, *J. Chem. Phys.*, 1993, **98**, 5648; (c) K. Burke, J. P. Perdew and W. Yang, *Electronic Density Functional Theory: Recent Progress and New Directions*, Plenum, New York, 1998.
3. (a) A. Bergner, M. Dolg, W. Kuechle, H. Stoll and H. Preuss, *Mol. Phys.*, 1993, **80**, 1431; (b) M. Dolg, H. Stoll, H. Preuss and R. M. Pitzer, *J. Phys. Chem.*, 1993, **97**, 5852; (c) M. Kaupp, P. v. R. Schleyer, H. Stoll and H. Preuss, *J. Chem. Phys.*, 1991, **94**, 1360.
4. A. Höllwarth, M. Böhme, S. Dapprich, A. W. Ehlers, A. Gobbi, V. Jonas, K. F. Köhler, R. Stegmann, A. Veldkamp and G. Frenking, *Chem. Phys. Lett.*, 1993, **208**, 237.
5. A. Moritz, X. Cao and M. Dolg, *Theor. Chem. Acc.*, 2007, **118**, 845.
6. (a) C. Gonzalez and H. B. Schlegel, *J. Phys. Chem.* 1990, **94**, 5523; (b) C. Gonzalez and H. B. Schlegel, *J. Chem. Phys.* 1989, **90**, 2154.
